1 Germinal center activity and B cell maturation promote protective antibody responses  
2 against *Plasmodium* pre-erythrocytic infection

3 Ganesh Ram R. Visweswaran<sup>1\*</sup>, Kamalakannan Vijayan<sup>1\*</sup>, Ramyavardhanee  
4 Chandrasekaran<sup>1, &</sup>, Olesya Trakhimets<sup>1</sup>, Samantha L. Whiteside<sup>1, @</sup>, Vladimir Vigdorovich<sup>1</sup>,  
5 Ashton Yang<sup>1, %</sup>, Andrew Raappana<sup>1</sup>, Alex Watson<sup>1</sup>, William Selman<sup>1</sup>, Meghan Zuck<sup>1, &</sup>,  
6 Nicholas Dambrauskas<sup>1</sup>, Alexis Kaushansky<sup>1,2,3,4,5,#</sup> and D. Noah Sather<sup>1,2,3,#</sup>

7 **Affiliations**

8 <sup>1</sup>Seattle Children's Research Institute, Seattle, Washington

9 <sup>2</sup>Department of Pediatrics, University of Washington, Seattle, Washington

10 <sup>3</sup>Department of Global Health, University of Washington, Seattle, Washington

11 <sup>4</sup>Brotman Baty Research Institute, Seattle, Washington

12 <sup>5</sup>Institute for Stem Cell and Regenerative Medicine, Seattle, Washington

13 <sup>&</sup>Current address: OncoResponse, Seattle, Washington

14 <sup>%</sup>Current address: Seattle Genetics, Seattle, Washington

15 <sup>@</sup>Current address: Lake Stevens School District, Lake Stevens, Washington

16 <sup>\*</sup>Equal contribution

17 <sup>#</sup>To whom correspondence should be addressed: [noah.sather@seattlechildrens.org](mailto:noah.sather@seattlechildrens.org) and  
18 [alexis.kaushansky@seattlechildrens.org](mailto:alexis.kaushansky@seattlechildrens.org)

19 **Abstract**

20 Blocking *Plasmodium*, the causative agent of malaria, at the asymptomatic pre-erythrocytic  
21 stage would abrogate disease pathology and prevent transmission. Rodent-infectious  
22 species of *Plasmodium* such as *P. yoelii* (*Py*) serve as key tools to study vaccine efficacy  
23 and disease biology in immune-competent experimental animals. Here we evaluated the  
24 differences in vaccine-elicited humoral immunity in two widely used, and vastly diverged,  
25 inbred mouse strains, BALB/cJ and C57BL/6J, and identified immunological factors  
26 associated with protection. We vaccinated with *Py* circumsporozoite protein (CSP), the major  
27 surface antigen on the sporozoite, and evaluated protective efficacy after mosquito bite  
28 challenge. Vaccination achieved 60% sterile protection and otherwise delayed blood stage  
29 patency in BALB/cJ mice, whereas; all C57BL/6J mice were infected similar to controls.  
30 Interestingly, protection was mediated by antibodies, and could be passively transferred from  
31 immunized BALB/cJ mice into naïve C57BL/6J. Dissection of the underlying immunological  
32 features of protection revealed early deficits in antibody titers and polyclonal avidity in  
33 C57BL/6J mice. Additionally, *Py*CSP-vaccination in BALB/cJ induced a significantly higher  
34 proportion of antigen-specific B-cells and class-switched memory B-cell (MBCs) populations  
35 than in C57BL/6J mice. Strikingly, C57BL/6J mice also had markedly fewer germinal center  
36 experienced, CSP-specific class-switched MBCs compared to BALB/cJ mice. Analysis of  
37 the IgG  $\gamma$  chain repertoires by next generation sequencing in *Py*CSP-specific memory B-cell  
38 repertoires also revealed higher somatic hypermutation rates in BALB/cJ mice than in  
39 C57BL/6J mice. These findings indicate that BALB/cJ mice achieved higher levels of B cell  
40 maturation in response to vaccination with *Py*CSP, which likely enabled the development of  
41 protective antibody responses. Overall, our study indicates that germinal center activity and  
42 B cell maturation are key processes in the development of vaccine-elicited protective  
43 antibodies against CSP.

## 44 Introduction

45 Malaria remains a major public health crisis, with more than 229 million cases resulting in  
46 more than 409K deaths in 2019, concentrated in sub-Saharan Africa and disproportionately  
47 affecting women and children (WHO, 2020). After peaking in 2004, cases have steadily  
48 declined, but in recent years cases have plateaued or slightly increased, highlighting the  
49 urgent need for new counter measures to achieve eradication (WHO, 2019). Vaccines that  
50 prevent infection with *Plasmodium* parasites, the causative agents of malaria, offer the best  
51 hope to overcome this plateau and facilitate eradication. While vaccines are in development  
52 for all stages of the *Plasmodium* life cycle, the pre-erythrocytic (PE) stage is an attractive  
53 target, as stopping the parasite at this asymptomatic stage would prevent infection,  
54 subsequent disease, and transmission (Burrows et al., 2017). RTS,S, the only malaria  
55 vaccine with regulatory approval (Olotu et al., 2016; Stoute et al., 1997; Sun et al., 2003),  
56 and the most clinically advanced whole sporozoite vaccine, PfSPZ (Sissoko et al., 2017),  
57 both target this stage and result in only partial protection in field trials. Recently, a new PE  
58 vaccine candidate, R21, achieved promising results in early clinical field trials (Dattoo et al.,  
59 2021). Subunit vaccines, such as RTS,S and R21, induce potent antibody responses against  
60 the major surface protein on the sporozoite, the Circumsporozoite Protein (CSP) (Dattoo et  
61 al., 2021; Sun et al., 2003). Whole sporozoite vaccines also elicit anti-CSP antibodies, they  
62 also produce antibodies to other *Plasmodium* antigens (Camponovo et al., 2020; Mordmuller  
63 et al., 2017).

64 The mechanisms by which pre-erythrocytic (PE) vaccines prevent malaria infection  
65 are yet to be fully characterized, but both antibodies and CD8<sup>+</sup> T cells have been implicated,  
66 depending on the vaccine modality (Epstein et al., 2011; Ewer et al., 2013; Ewer et al., 2015)  
67 Antibodies have been shown to mediate anti-parasitic activity and are thought to work  
68 primarily in the skin and interstitial tissues where they interfere with the sporozoite's motility  
69 and survival (Aliprandini et al., 2018). This has been confirmed by studies of monoclonal  
70 antibodies (mAbs) targeting CSP, which have been shown experimentally to reduce or  
71 prevent *Plasmodium falciparum* infection (Aliprandini et al., 2018). The study of anti-CSP  
72 mAbs isolated from humans has implicated antibody affinity, epitope specificity, and B cell  
73 clonal selection as key factors mediating protective function (Murugan et al., 2018). Together  
74 these studies indicate that antibodies are a key mediator of protection in subunit PE  
75 vaccines, and that protective antibodies have inherent features that determine neutralizing  
76 capacity. Whereas mAbs have been instrumental to our understanding of antibody-mediated  
77 protection from malaria, vaccination with CSP induces complex polyclonal responses  
78 consisting of a diversity of antibodies. The key features of vaccine-elicited polyclonal  
79 antibody responses that determine protection from infection have yet to be fully defined, but

80 their characterization would be a critical milestone toward the development of an effective  
81 CSP-based vaccine.

82 Here, we aimed to identify the characteristics of protective antibody responses  
83 elicited by full-length CSP vaccination using the rodent malaria, *P. yoelii*. This model of  
84 malaria infection enabled us to conduct live vaccination and mosquito bite challenges in a  
85 wild type experimental system to dissect the correlates of antibody-mediated protection. To  
86 identify features associated with efficacy, we characterized vaccine-elicited B cell responses  
87 in two highly diverged mouse strains, BALB/cJ and C57BL/6J, that exhibited differential  
88 vaccine-mediated sterilizing immunity. We evaluated serum antibody responses,  
89 characterized CSP-specific B cell phenotypes, and compared B cell receptor repertoires  
90 between the two strains in response to CSP vaccination. We found that vaccine-elicited anti-  
91 CSP antibodies alone are sufficient to achieve sterile protection from infection, and that  
92 protection was associated with higher magnitude germinal center (GC) responses and  
93 somatic mutation of CSP-specific B cells. These findings implicate B cell maturation as a  
94 critical determinant in the development of potent sterilizing antibody-mediated immunity  
95 against malaria and indicate that vaccine modalities aimed at inducing mature B cell  
96 responses will be necessary to achieve sterilizing immunity in the field.

97

## 98 Results

### 99 Immunization with *PyCSP* elicits anti-parasitic antibodies and sterile protection from 100 *P. yoelii* in BALB/cJ, but not C57BL/6J mice

101 The major strains used to study vaccine efficacy and host pathogen interactions in murine  
102 models of malaria infection are BALB/cJ and C57BL/6J (Benhnini et al., 2009; Kuipers et al.,  
103 2017). In our studies of CSP vaccine-elicited vaccine efficacy, we observed that these two  
104 strains exhibited differential levels of protection in a subunit immunization, mosquito bite  
105 challenge model, where we routinely failed to achieve sterilizing immunity in C57BL/6J mice.  
106 To compare efficacy directly, we immunized animals (n=10 per group) with 20 µg of full  
107 length ecto-domain recombinant *PyCSP* in 20% adjuvax adjuvant at weeks 0, 2 and 6  
108 (Figure 1A). Control groups received PBS-formulated with 20% adjuvax. At weeks 3 and 7,  
109 blood samples were collected to evaluate the antibody responses elicited by the vaccination.  
110 At week 7, both mouse strains were subjected to *P. yoelii* 17XNL sporozoite infection by  
111 mosquito-bite challenge (15 mosquitoes/mouse) and were monitored for three weeks or until  
112 blood-stage patency was reached. All the placebo-injected control mice in both the BALB/cJ  
113 and C57BL/6J groups developed blood-stage patency in as early as 5 days post mosquito  
114 bite challenge, indicating that the strains were equally susceptible to infection (Figure 1B), as  
115 has been reported previously (Miller et al., 2014). All of the *PyCSP*-vaccinated C57BL/6J  
116 mice were unprotected and developed blood-stage patency 6 days post mosquito bite  
117 challenge. Surprisingly, in contrast to the C57BL/6J mice, *PyCSP*-immunized BALB/cJ mice  
118 exhibited sterile protection from infection (60%). Six BALB/cJ mice were parasite free at the  
119 end of the experiment, and the remaining mice (40%) exhibited a significant delay in blood  
120 stage patency (7 days) (Figure 1B and S1A).

121 To characterize the underlying immune responses mediating sterile protection, we analyzed  
122 the anti-parasitic activity of serum polyclonal antibodies (pAbs) *in vitro* and *in vivo*. Anti-CSP  
123 serum antibodies from both strains recognized CSP on the surface of the *P. yoelii* sporozoite  
124 by immunofluorescence microscopy (Figure 1C), indicating that both strains developed  
125 antibodies capable of recognizing surface displayed CSP on the sporozoite. However, only  
126 BALB/cJ anti-CSP pAbs induced a CSP reaction on sporozoites (Figure 1C, arrows) in which  
127 neutralizing antibodies (Nabs) induce the sporozoite to “shed” its coat of CSP (Balaban et  
128 al., 2021; Ghosh and Jacobs-Lorena, 2009; Vanderberg et al., 1969) We then characterized  
129 *in vitro* inhibitory activity in the inhibition of Sporozoite Traversal and Invasion (ISTI) assay.  
130 *PyCSP*-immunized BALB/cJ and C57BL/6J serum antibodies from Weeks 3 and 7 were pre-  
131 incubated with *Py* sporozoites and the percentage invasion and traversal to hepatocytes  
132 were analyzed. *PyCSP*-immunized BALB/cJ immune serum from both weeks 3 and 7

133 significantly inhibited sporozoite invasion into hepatocytes compared to controls, whereas  
134 *PyCSP*-immunized C57BL/6J immune serum from weeks 3 and 7 did not inhibit invasion  
135 above background levels (Figure 1D). Similarly, *PyCSP*-immunized BALB/cJ pAbs  
136 significantly reduced sporozoite traversal at weeks 3 and 7 through hepatocytes compared  
137 to controls, whereas *PyCSP*-immunized C57BL/6J immune serum did not inhibit traversal  
138 above background levels at any time (Figure 1E).

139 To evaluate the differential functional activity *in vivo*, and to assess potential infection  
140 differences due to mouse strain, we performed a pAb swap infection challenge and sterile  
141 protection experiment. BALB/cJ or C57BL/6J mice were immunized with *PyCSP* as shown in  
142 Figure 1A and then protein A purified pAbs from immunized (Post 3<sup>rd</sup> immunization) animals  
143 or naïve controls were passively infused into strain mis-matched naïve mice five days prior  
144 to mosquito bite challenge (15 mosquitoes/mouse). Mice were monitored for two weeks or  
145 until blood-stage patency was reached. Thus, C57BL/6J immune and naïve serum was  
146 infused into naïve BALB/cJ mice prior to challenge, and vice versa. The pAbs were purified  
147 from pooled serum and the anti-CSP content was quantified using a standard curve  
148 generated with canonical neutralizing anti-*PyCSP* mAb, 2F6. Each animal received an  
149 equivalent of 90 µg of polyclonal anti-CSP antibody, with naïve animals receiving 90 µg total  
150 IgG. C57BL/6J mice that received BALB/cJ-derived anti-CSP pAbs exhibited delays to  
151 patency and 40-60% sterile protection, depending on the experiment (Figure 1F and S1B),  
152 whereas BALB/cJ mice infused with C57BL/6J-derived anti-CSP pAbs were not protected  
153 and all became infected similar to controls (Figure 1F and S1B). These findings demonstrate  
154 that the protection observed in vaccinated BALB/cJ mice is mediated by antibodies alone.  
155 Further, it implies that there are specific features of vaccine-elicited antibodies in BALB/cJ  
156 mice that are critical to achieving sterile protection, features that likely do not exist in  
157 C57BL/6J mice. This differential model of sterile protection from malaria afforded the  
158 opportunity to assess what characteristics of the B cell response are associated with  
159 protection from infection.

### 160 ***PyCSP* immunized C57BL/6J mice exhibit early deficits in the development of anti-** 161 **CSP antibodies**

162 To investigate the underlying differences in the protection between *PyCSP*-immunized  
163 BALB/cJ and C57BL/6J mice, we analyzed *PyCSP*-specific plasma IgG responses over the  
164 course of vaccination. Antibodies are often not measurable after the first immunization but  
165 reach high levels with the anamnestic response after the boost immunizations. Thus, we  
166 focused on studying samples from after the second and third immunizations, at weeks 3 and  
167 7, respectively. At week 3, α-CSP IgG endpoint titers were nearly one log<sub>10</sub> higher in

168 BALB/cJ mice than in C57BL/6J mice (Figure 2A). However, by week 7, one week post third  
169 immunization and just before mosquito-bite challenge, IgG titers were similar between the  
170 strains (Figure 2A). No difference in IgG subclass usage was observed at week 7, and both  
171 strains had similar  $\alpha$ -CSP titers of IgG1 and IgG2b antibodies (C57BL/6J do not express  
172 Ig2a) (Figure S2). Thus, although we detected an early difference in overall binding titers, at  
173 the time of challenge the strains had similar levels and subclass distribution of circulating  $\alpha$ -  
174 CSP IgG antibodies.

175 We next measured the avidity index of the serum IgG to full ectodomain PyCSP over the  
176 course of immunization, which is a surrogate measure of the strength of polyclonal antibody  
177 binding to the protein. Binding is measured in the presence and absence of thiocyanate  
178 chaotrope, and the relative disruption of binding is used to generate an index value (Pullen  
179 et al., 1986). Interestingly, C57BL/6J mice had significantly lower avidity for recombinant  
180 PyCSP after the second immunization at week 3 (Figure 2E), indicating a potential early  
181 deficit in antibody maturation. By week 7 the avidity indices against full length rec-PyCSP  
182 were statistically similar. However, this lack of difference in polyclonal avidity at week 7 is  
183 likely due to the course measure of the binding characteristics of a diverse mixture of  
184 antibodies as a population, where the potential presence of less frequent high affinity clones  
185 may not be sufficient to influence the overall avidity index.

186 To determine whether differential protection could be attributed to epitope specificity, we  
187 generated repeat peptides corresponding to the major and minor repeat regions (Figure 2C)  
188 and assessed IgG binding over the course of immunization. The repeat regions are known to  
189 be the target of neutralizing antibodies, whereas the N- and C-terminal domains have not  
190 been implicated as targets for neutralizing antibodies (Kisalu et al., 2018; Scally et al., 2018;  
191 Tan et al., 2018; Thai et al., 2020; Triller et al., 2017). The repeat region in PyCSP contains  
192 two general motifs that make up the longer, N-terminal major repeat region and the shorter,  
193 more C-terminal minor repeats (Figure 2B). The minor repeat region is the target of potent  $\alpha$ -  
194 PyCSP neutralizing antibody activity of mAb 2F6 (Bruna-Romero et al., 2004; Sack et al.,  
195 2014; Vijayan et al., 2021) but neutralization targeting the major repeat has not been  
196 reported. At week 3, the strains had equivalent IgG titers to the major repeat peptide, but  
197 BALB/cJ mice had significantly higher titers to the minor repeat peptide (Figure 2D). At week  
198 7, IgG titers to the major repeat remained statistically similar, but, although the difference  
199 was not statistically significant, C57BL/6J titers to the minor repeat trended lower (Figure  
200 2D). These findings imply that the unprotected phenotype in C57BL/6J mice may be due to  
201 dampened antibody responses to the minor repeat, which is known to mediate  
202 neutralization.

203 **Both major and minor repeat motifs of *PyCSP* mediate sterile protection from *P. yoelii***  
204 **infection**

205 To evaluate this possibility, we investigated whether the major repeat also could be a target  
206 for NABs, or whether neutralization is solely mediated through the minor repeat motif as  
207 observed for mAb 2F6. We previously characterized a non-neutralizing antibody (nNAb),  
208 RAM1, which binds to the major repeat with relatively low affinity, does not induce the CSP  
209 reaction, nor protects *in vitro* or *in vivo* (Vijayan et al., 2021). In this study, we isolated a  
210 mAb RAM2, which also binds to an epitope in the major repeat motif like RAM1 (Figure 3A  
211 and 3D). RAM2 bound to recombinant CSP with a similar  $EC_{50}$  to that of 2F6 by ELISA  
212 (Figure 3B), and both mAbs had similar binding kinetics measured by Octet-BLI (Figure 3C).  
213 In contrast to RAM1, RAM2 induces the CSP reaction (Figure 3E) and blocks *in vitro*  
214 infection in ISTI to similar levels the NAb 2F6 (Figure 3F). Unlike RAM1, RAM2 also  
215 facilitates sterile protection *in vivo* when administered by passive infusion at survival levels  
216 that mirror 2F6 (Figure 3G), indicating that potent neutralization can target either the major  
217 or minor repeat motifs, and that the differential protection between mouse strains cannot be  
218 fully explained by differential responses to the major and minor repeat motifs.

219 Although RAM1 and RAM2 both target the major repeat domain, they do so with drastically  
220 different binding kinetics. RAM2 Fab binds to recombinant CSP with a  $K_D$   $7.85 \times 10^{-7}$  M and  
221 with an association and dissociation kinetics values of  $K_{on}$  ( $1.25 \times 10^4$  1/Ms) and  $K_{off}$  ( $9.84 \times$   
222  $10^{-3}$  1/s), whereas RAM1 Fab exhibits little binding to CSP and we were unable to derive a  
223 measurable  $K_D$  (Figure S3; Vijayan et al., 2021). By comparison, the minor repeat NAb 2F6  
224 Fab binds to rec-*PyCSP* with a  $K_D$  of  $5.24 \times 10^{-7}$  M (Vijayan et al., 2021). This difference in  
225 binding affinity between RAM1 and RAM2 is likely a major contributor to their differential  
226 functional activity and implies that there may be a minimum threshold for affinity that is  
227 necessary to achieve neutralization. Further, these findings raise the possibility that the lack  
228 of neutralization in C57BL/6J mice may be due to a lack of high affinity B cell clones,  
229 potentially driven by lower B cell maturation. Taken together, these findings implicate  
230 antibody affinity as a potential key feature of protective antibody responses against  
231 *Plasmodium*.

232 **Dampened B cell responses elicited by vaccination in C57BL/6J mice**

233 We next evaluated if differential antibody protection between BALB/cJ and C57BL/6J mice  
234 was a consequence of nuanced responses to *PyCSP* vaccination in the B cell compartment.  
235 To assess the potential immunological origins of the differential protection, we characterized  
236 anti-CSP-specific B cell responses in the spleen after vaccination. Splenocytes were  
237 harvested at week 3 and 7 or post 1 week after the second and third immunizations,



238 respectively, and stained with markers for flow cytometric analyses, including B220, GL-7,  
239 CD38, IgD, IgM, and CD138. Recombinant CSP was tetramerized by conjugation to  
240 streptavidin-conjugated APC and APC/Fire750, which were used for column enrichment and  
241 dual staining for *PyCSP*-reactive cells. We assessed and quantified the total number of  
242 splenic *PyCSP*-specific B-cells (CD3<sup>-</sup>, B220<sup>+</sup>, CSP<sup>+</sup>), IgM memory B-cells (MBCs) (CD3<sup>-</sup>,  
243 B220<sup>+</sup>, CD38<sup>+</sup>, CD138<sup>-</sup>, IgM<sup>+</sup>, IgD<sup>-</sup>, CSP<sup>+</sup>), germinal center (GC) experienced MBCs (CD3<sup>-</sup>,  
244 B220<sup>+</sup>, GL7<sup>+</sup>, CSP<sup>+</sup>), and class-switched MBCs (CD3<sup>-</sup>, B220<sup>+</sup>, CD38<sup>+</sup>, CD138<sup>-</sup>, IgM<sup>-</sup>, IgD<sup>-</sup>,  
245 CSP<sup>+</sup>) (Figure 4 and S4). Both immunized animals and strain-matched placebo immunized  
246 animals were analyzed.

247 Interestingly, *PyCSP*-immunized BALB/cJ mice exhibited significantly higher numbers of  
248 splenic *PyCSP*-specific B-cells after the 2<sup>nd</sup> and 3<sup>rd</sup> immunizations (Figure 4A), indicating a  
249 more robust anamnestic response than in vaccinated C57BL/6J mice. This difference was  
250 especially apparent in week three, which follows the second immunization, where CSP-  
251 specific B cells were nearly 3-fold higher. We did not detect differences in the frequency of  
252 CSP<sup>+</sup> IgM MBCs after either immunization (Figure 4B), although their frequency was  
253 relatively low in all samples. However, *PyCSP*-immunized BALB/cJ had more than 3-fold  
254 higher numbers of class-switched CSP<sup>+</sup> MBCs at week three after the second immunization  
255 and statistically higher numbers at week 7 (Figure 4C). Strikingly, BALB/cJ mice had  
256 approximately 10-fold higher numbers of splenic GL7<sup>+</sup>, GC-experienced CSP-specific B cells  
257 than C57BL/6J mice after the second immunization (week 3), and approximately 5-fold more  
258 after the third immunization (week 7) (Figure 4D). Thus, except for IgM<sup>+</sup> MBCs, BALB/cJ  
259 mice exhibited comparatively higher *PyCSP*-specific B cell responses, GC activity, and class  
260 switch in response to vaccination. As these timepoints measure the anamnestic response,  
261 these findings also indicate marked differences in recall responses between the strains. The  
262 relative paucity of GC-experienced and class switched MBCs in C57BL/6J mice is intriguing,  
263 and likely explains the early differences in IgG titers and binding avidity observed after the  
264 second immunization. Overall, the relative deficit GC activity and class switched MBCs may  
265 contribute to the inability of vaccinated C57BL/6J mice to produce antibodies that can  
266 mediate sterile protection from infection.

### 267 ***PyCSP*-immunized BALB/cJ mice achieve higher levels of somatic mutation in** 268 **response to vaccination**

269 It is possible that the differences in germinal center activity affect overall maturation and  
270 somatic mutation within the CSP-specific B cell receptor (BCR) repertoire, which ultimately  
271 drives the generation of high affinity antibodies after vaccination. To assess this, we sorted  
272 class-switched CSP- reactive MBCs after either two or three immunizations with

273 recombinant PyCSP and sequenced their IgH heavy chain B cell receptor repertoire by  
274 5'RACE next generation sequencing. Class-switched CSP-specific MBCs (CD3<sup>-</sup>, B220<sup>+</sup>,  
275 IgM<sup>-</sup>, IgD<sup>-</sup>, CD38<sup>+</sup>, anti-CSP<sup>+</sup>) were stained and enriched as described above, and then  
276 sorted into RLT lysis buffer by fluorescent activated cell sorting (FACS). Class switched  
277 MBCs from unimmunized animals were also sorted to serve as a reference for sequence  
278 analysis. The sorted, CSP-specific MBCs in mice within each strain were combined, and  
279 then IgG transcripts were amplified by 5' Rapid amplification of cDNA ends (5'RACE) and  
280 sequenced on an Illumina MiSeq instrument, allowing the retrieval of the entire V, D, J  
281 rearrangement. The resulting sequences were processed in our in-house bioinformatics  
282 pipeline for processing and V/D/J gene annotation and were analyzed to determine the  
283 percent identity of each BCR from germline alleles (i.e., rates of somatic mutation) and third  
284 complementarity determining region of antibody heavy chains (CDRH3) characteristics.  
285 Higher percent identity to germline indicates less mutation, and conversely, lower identity  
286 indicates higher rates of mutation. We annotated and estimated the percent sequence  
287 identity to V-region germline of the CSP-specific BCR repertoire at weeks three and seven  
288 (i.e., one week post two or three immunizations, respectively), as well as the total class  
289 switched MBC IgG BCR repertoire from unimmunized animals (Figure 5). The CDRH3 size  
290 distributions of the sequenced  $\gamma$  chain repertoires are shown in Figure S5.

291 The average CSP-specific MBC V-region identity after two immunizations in BALB/cJ mice  
292 was 98.73%. After three immunizations, identity dropped significantly to an average of  
293 97.15%, perhaps an indicator of higher levels of affinity maturation and somatic mutation  
294 stimulated by the third immunization (Figure 5A). BCR sequences after three immunizations  
295 were detected with as low as ~86% identity, and numerous sequences were identified with  
296 less than 92.5% identity. Thus, IgG heavy chains with 7.5-14% somatic mutation were  
297 generated in response to vaccination, although these were in the minority in the overall  
298 repertoire. The identity to germline of CSP-specific MBCs was statistically higher after two  
299 immunizations than the average identity of MBCs in unimmunized BALB/cJ mice (98.73%  
300 vs. 98.18%), but lower after three immunizations (98.18% vs 97.15%). Thus, on average,  
301 compared to the total MBC repertoire in unimmunized animals, CSP-specific MBCs had less  
302 mutation after two immunizations, a possible consequence of BCR clonal selection, but  
303 significantly more mutation after three immunizations, suggesting ongoing diversification and  
304 affinity maturation.

305 In contrast, the average identity of CSP-specific IgG heavy chains in C57BL/6J mice was  
306 99.49% after two immunizations and 98.33% after three (Figure 5B), with only very rare  
307 outliers detected with more than 7.5% mutation. Thus, the CSP-specific IgG heavy chain

308 repertoire in C57BL/6J mice after two immunizations remained close to germline identity,  
309 possibly related to the lack of GC experienced CSP-specific MBCs detected at this timepoint  
310 (Figure 4D). Of note, the non-CSP MBC BCR repertoire in unimmunized mice was more  
311 diverse in BALB/cJ mice than in C57BL/6J mice (98.13% vs 99.07), which may be indicative  
312 of intrinsic underlying differences between the strains. Taken together, these findings  
313 indicate that BALB/cJ mice appear to generate higher levels of somatic mutation in response  
314 to vaccination with *PyCSP*. It follows that the higher level of mutation more commonly  
315 generated in BALB/cJ mice could be a key factor in their ability to generate high affinity anti-  
316 CSP antibodies and achieve sterile protection from infection.

317

## 318 **Discussion**

319 Defining the features of antibodies that mediate protection from pre-erythrocytic malaria  
320 infection is a key milestone that will guide future vaccine development efforts. As RTS,S rolls  
321 out more widely, and newer protein-based vaccines are developed, such as R21, it is  
322 essential to understand the key characteristics of vaccine-elicited antibody responses that  
323 mediate protection from liver stage infection. Here we studied vaccine responses in two  
324 strains of mice, BALB/cJ and C57BL/6J, that differ in their sterile protection from infection in  
325 response to vaccination with recombinant *PyCSP*. We studied several aspects of the B cell  
326 response to vaccination and identified key differences that implicate B cell maturation as a  
327 defining factor in the development of protective antibody responses. These findings have  
328 direct implications for vaccine development, highlighting the urgent need for vaccine  
329 formulations and regimens that drive potent, mature antibody responses.

330 Previous studies have established that binding affinity to CSP is a key factor in the ability of  
331 monoclonal antibodies to neutralize infection (Epstein et al., 2011; Jongo et al., 2018;  
332 Sissoko et al., 2017; Vijayan et al., 2021). High affinity antibodies are generated through the  
333 process of affinity maturation. This occurs in the primary and secondary lymphoid tissues,  
334 where antigen-reactive B cells proliferate and migrate into germinal centers. Once in  
335 germinal centers, they undergo rounds of somatic hypermutation and clonal selection,  
336 ultimately resulting in high affinity B cell clones that secrete antibodies. The effect of affinity  
337 on neutralization is exemplified by the mAbs RAM1 and RAM2. RAM2 is protective, whereas  
338 RAM1 is not, despite binding to the same peptide repeats. In this scenario, affinity is the  
339 major factor driving the difference in neutralization; RAM2 binds with an affinity several  
340 orders of magnitude higher than RAM1.

341 Thus, the significant lack of germinal center experienced B cells in C57BL/6J mice is striking,  
342 as it indicates that this process is either impaired or happening far less frequently than in  
343 BALB/cJ mice. These observations dovetail with our finding that less somatic hypermutation  
344 from germline occurred in C57BL/6J mice within the CSP-specific class-switched MBC  
345 compartment, indicating that less B cell maturation occurred after vaccination. In fact, the  
346 CSP-specific BCR repertoire population average remained close to germline identity, even  
347 after the anamnestic response of the second immunization. The natural consequence of less  
348 B cell maturation is likely that fewer, less diverse high affinity BCR clones are generated  
349 after vaccination, or that overall, the population may be less mutated, as we observed. This  
350 is also evident in the lower polyclonal avidity after the second immunization, which may be a  
351 significant underlying factor in the lack of antibody protection. Each of these observations  
352 support the model where less efficient germinal center activity and class switch (and, in turn,

353 insufficient high-affinity CSP antibodies) in C57BL/6J mice leads to a lack of sterilizing  
354 protection, whereas robust affinity maturation activity in BALB/cJ mice, resulting in a subset  
355 of high-affinity NAbS like RAM2 and 2F6, leads to sterilizing protection (Figure 6).

356 The underlying immunological origins of reduced germinal center activity in C57BL/6J mice  
357 remain unclear and could relate to potential differences in HLA or MHC alleles or subpar T  
358 helper responses. However, vaccine protection from *P. berghei* rodent malaria infection has  
359 been reported in C57BL/6J mice, especially with adjuvants that strongly drive B cell  
360 development, such as Matrix M (Collins et al., 2021). Further, in this study passive transfer  
361 of CSP-specific antibodies elicited in BALB/cJ mice achieved sterile protection in C57BL/6J  
362 mice. This indicates that it is possible to elicit or passively transfer antibodies in C57BL/6J  
363 mice that mediate sterile protection. As such, it is likely that our vaccine regimen was not  
364 sufficient to elicit antibodies with the desired characteristics in C57BL/6J, despite eliciting  
365 very high titers of anti-*Py*CSP antibodies. Therefore, it is not that C57BL/6J mice were  
366 generally hypo-responsive to vaccination or overly sensitive to infection, but rather a deficit  
367 in maturing the B response toward ideal neutralization characteristics likely underlies the  
368 total lack of protection. Thus, although we do not know the underpinnings of the differential  
369 antibody responses in C57/BL6J mice, comparative use of this model allowed the  
370 identification of fundamental immunological processes that could be key parameters for  
371 achieving durable sterilizing immunity.

372 It is intriguing that C57BL/6J mice lacked any measurable protection from infection,  
373 despite statistically equivalent polyclonal antibody avidity indices in the samples taken just  
374 prior to mosquito bite challenge (Figure 2E). The avidity index is based on chaotrope  
375 disruption of binding in ELISA and is a coarse measure of the binding behavior of antibodies  
376 as a population mixture (Alexander et al., 2015; Pullen et al., 1986). This measure is  
377 extensively used as a surrogate measure of aggregate B cell maturation. However, this  
378 measure can be influenced by nuances in epitope specificity and valency, and may under  
379 measure more rare high affinity, highly functional antibodies (Alexander et al., 2015). Much  
380 of the antibody response may not be relevant or effective for sterile protection, and it is likely  
381 that only a subset of B cell clones will produce antibodies with the desired characteristics.  
382 Given the equivalent IgG titers and avidity indices just prior to infection challenge, it is  
383 possible that that the protection in BALB/cJ mice is mediated by relatively rare, highly  
384 mutated, high affinity B cell clones, rather than through a large population of antibodies that  
385 may be less mutated and lower affinity. To deconvolve this will likely require further  
386 examination at single B cell level, where direct affinity/functional relationships can be  
387 determined, as we have done for RAM1 and RAM2. Indeed, in studies of natural infection

388 and whole sporozoite vaccination, only a tiny fraction of antibodies obtained are functional  
389 against the parasite, implying that potent functional antibodies are rare in the overall B cell  
390 repertoire (Camponovo et al., 2020).

391 Eliciting durable, potent antibody responses by vaccination is a considerable  
392 challenge for the field. RTS,S, which contains the potent adjuvant AS01, elicits high titers of  
393 CSP antibodies, but titers and partial protection wanes quickly after vaccination (Dattoo et al.,  
394 2021). R21, which is similar to RTS,S, is currently in testing with the potent adjuvant Matrix  
395 M, which is hoped to be superior in eliciting high titers of antibody responses (Dattoo et al.,  
396 2021). However, our findings imply that high titers of antibodies alone are not sufficient to  
397 achieve potent, durable protection from infection. Rather, it is the quality of the antibodies in  
398 the response that will determine whether protection can be achieved. A careful examination  
399 of B cell responses, including the extent of their hypermutation and germinal center  
400 experience, may be critical for extracting meaningful correlates of protection and, ultimately,  
401 designing the most potent vaccine regimen against malaria. Novel approaches that  
402 emphasize the elicitation of high affinity antibodies to neutralizing epitopes will likely be a  
403 more fruitful path forward for vaccine development. Such a vaccine would dramatically  
404 impact our ability to curtail malaria infection worldwide and could make a substantial impact  
405 in the push towards eradication.

## 406 **Materials and Methods**

### 407 **Cloning and production of *PyCSP* and truncation constructs**

408 *P. yoelii* CSP, a 403-amino acid (aa) protein, consisting of an N- and C-terminal domains  
409 connected by a central repeat domain (Figure 2B). The two predicted *N*-glycosylation sites  
410 (S27A, T348A), one each in the N- and C-terminal domains of the native antigen were  
411 mutated to prevent the addition of N-linked glycans in the mammalian expression system  
412 and the non-glycosylated protein, *PyCSP* (38.3 kDa), is used in this study. The cartoon  
413 representing the *PyCSP*, and different major and minor repeat peptides used in this work are  
414 illustrated in Figure 2B and the construction and expression of the protein is published  
415 elsewhere (Vijayan et al., 2021). The *PyCSP* antigen was codon optimized for human bias  
416 and C-terminally 8X His and Avi-tagged, connected via a GS-linker to the antigen, to  
417 facilitate purification and biotinylation. A tPA signal was added at the N-terminus to facilitate  
418 protein secretion and the construct was cloned into pcDNA3.4 vector (Thermo Fisher,  
419 Waltham, MA, USA) which drives transcription via a CMV promoter. After sequence  
420 confirmation the plasmid DNA (500 ng/ml of cells) encoding the antigens were introduced  
421 into HEK293 suspension cultures (1 million/ml) by high-density transfection using 2 mg/ml  
422 polyethyleneimine (PEI) (1:5 Pei:plasmid DNA). Cells were grown in FreeStyle 293 serum-  
423 free media (Thermo Fisher) for five days at 37°C 8% CO<sub>2</sub>. Cells were spun down by  
424 centrifugation (4000 rpm for 20 min at 4°C) and the supernatant was collected. Sodium azide  
425 was added to a final concentration of 0.02% and NaCl was added to a final concentration of  
426 500 mM. The antigens were purified by a two-step chromatography protocol. The proteins  
427 were captured using Ni-NTA (Qiagen, Germantown, MD, USA), washed in EQ buffer (25 mM  
428 Tris pH 8.0, 300 mM NaCl, 0.02% NaN<sub>3</sub>), and eluted in EL buffer (25 mM Tris pH 8.0, 300  
429 mM NaCl, 200 mM Imidazole, 0.02% NaN<sub>3</sub>). The elution fractions were collected, pooled,  
430 and concentrated and further purified on a standardized Superdex 200 16/600 (GE  
431 Healthcare, Chicago, IL, USA) column running in HBS-E (10 mM HEPES, pH 7, 150 mM  
432 NaCl, 2 mM EDTA). Peak fractions were pooled, concentrated, and stored at 4°C until use.

### 433 **Animal immunization**

434 All animal studies were conducted under protocols reviewed and approved by the  
435 Institutional Animal Care and Use Committee (IACUC) at Seattle Children's Research  
436 Institute. For regular immunization of 6-8 weeks old female BALB/cJ and C57BL/6J mice, 20  
437 µg of *PyCSP* formulated in 20% adjuvax is administered intramuscularly at weeks 0, 2 and  
438 6. Blood samples were collected at one week post 2<sup>nd</sup> and 3<sup>rd</sup> immunizations i.e., week 3 and  
439 week 7, by submandibular or chin bleeds. Placebo-injected mice were used as experimental  
440 control. For studying the B-cell responses and NGS of the antigen-specific memory B-cells,  
441 mice were harvested at week 7 followed by splenocyte isolation. For pathogen challenge

442 experiments, all the mice were exposed to *P. yoelii* infected mosquito bite challenge (10-15  
443 mosquitoes/mouse) in week 7 and followed for 2-3 weeks for blood-stage patency. For  
444 serum antibodies swap passive transfer experiment, all the BALB/cJ mice were injected i.p.,  
445 with 90 µg PyCSP-antibodies purified from PyCSP-immunized C57BL/6J mice and vice  
446 versa followed by mosquito bite challenge (10-15 mosquitoes/mouse) 5 days post passive  
447 transfer of antibodies. As a control, purified naïve BALB/cJ serum antibodies (90 µg) were  
448 i.p., transferred to C57BL/6J mice and vice versa. All the mice were monitored for 2-3 weeks  
449 for blood stage patency.

#### 450 **ELISA**

451 Plasma antibody binding to PyCSP and to different truncation variants and peptides were  
452 determined using a Streptavidin-capture ELISA. Mouse plasma samples were heat-  
453 inactivated for 30 min at 56°C prior to all assays. All ELISA incubations were done for 1 h at  
454 37°C and plates were washed between each ELISA step with PBS, 0.2% Tween-20. To  
455 determine antibody binding to the ligand, Immulon 2HB 96-well plates (Thermo Scientific,  
456 3455) were coated with 50 ng/well of Streptavidin (NEB, N7021S) in 0.1 M NaHCO<sub>3</sub>, pH 9.5,  
457 followed by blocking with 3% BSA in PBS. Later the plates were coated with 200 ng/well with  
458 biotinylated ligand antigen or peptides followed by a blocking step 10% non-fat milk, 0.3%  
459 Tween-20 in PBS. Later mouse plasma was serially diluted in duplicate over a range of  
460 1:200 to 1:55,987,200 in PBS with 0.2% BSA. PyCSP mAb, 2F6, was serially diluted on  
461 each plate to ensure intra-assay consistency. Bound antibodies were detected using goat  
462 anti-mouse IgG Fc-HRP (Southern Biotech) or goat anti-mouse IgG1 Fc-HRP (Southern  
463 Biotech) or goat anti-mouse IgG2a Fc-HRP (Southern Biotech) or goat anti-mouse IgG2b  
464 Fc-HRP (Southern Biotech) at 1:2000 dilution in PBS with 0.2% BSA. Plates were developed  
465 with 50 µl/well of TMB Peroxidase Substrate (SeraCare Life Sciences Inc, 5120-0083) and  
466 stopped after 3 min with 50 µl/well of 1 N H<sub>2</sub>SO<sub>4</sub>. Absorbance at 450 nm was read using a  
467 BioTek ELx800 microplate reader. Binding curves were generated by nonlinear regression  
468 (log[agonist] vs response [three parameters]) in GraphPad Prism V8 (San Diego, CA).  
469 Endpoint titers were defined as the reciprocal of plasma dilution at OD 0.1.

#### 470 **Chaotrope Dissociation ELISA**

471 Antibody avidity of post-2<sup>nd</sup> and 3<sup>rd</sup> (Week 3 and week 7) immunization plasma samples to  
472 PyCSP were determined using direct immobilization ELISA. Immulon 2HB 96-well plates  
473 (Thermo Scientific, 3455) were coated with 50 ng/well of PyCSP overnight at room  
474 temperature, then blocked the following day with PBS, 10% non-fat milk, 0.3% Tween-20 for  
475 1 h at 37°C. Plates were washed between each step with PBS-containing 0.2% Tween-20.  
476 Mouse plasma samples were heat-inactivated for 30 min at 56°C prior to all assays. Plasma



477 was diluted in PBS, 10% non-fat milk, 0.03% Tween-20 over a range of 1:50 to 1:9,331,200  
478 and plated in quadruplicate side-by-side on the same plate. After a 1 h incubation with  
479 antibodies, plates were washed, and half of the sample wells were treated with 2 M NH<sub>4</sub>SCN  
480 in PBS, while the other half was treated with PBS alone for 30 min at room temperature.  
481 Plates were then washed and goat anti-mouse IgG Fc-HRP (Southern Biotech, 1013-05)  
482 was added to the plate at 1:2000 in PBS, 10% non-fat milk, 0.03% Tween-20. Plates were  
483 developed as described above. The avidity index was calculated as the ratio of AUC of  
484 samples treated with 2 M NH<sub>4</sub>SCN over AUC of samples treated with PBS: (AUC<sub>NH<sub>4</sub>SCN</sub> /  
485 AUC<sub>PBS</sub>)×100.

#### 486 **Monoclonal antibodies isolation and production**

487 The method of generation of PyCSP monoclonal antibodies were described earlier  
488 (Carbonetti et al., 2017; Vijayan et al 2021). Briefly, six weeks old female BALB/cJ mice  
489 were immunized with 20 µg of PyCSP adjuvanted with 20% v/v of Adjuvax at 0, 2 and 6  
490 weeks followed by spleens harvest and splenocyte isolation at Week 7. Using EasySep  
491 mouse B cell enrichment kit and manufacturer's protocol (StemCell Technologies Inc.,  
492 Tukwila, WA, USA), B cells were isolated by negative selection and resuspended in FACS  
493 buffer (PBS with 2% Fetal calf serum) followed by staining with anti-mouse CD16/CD32  
494 (mouse Fc block; BD Biosciences) and a decoy tetramer (BV510) for 10 mins at room  
495 temperature. Later the cells were stained with CD38-APC, IgM-FITC, IgD-AF700, B220-  
496 PacBlue (BioLegend, San Diego, CA, USA) and PyCSP tetramer (BV786) for 30 mins at 4°C  
497 followed by a wash with FACS buffer. Finally, the cells were resuspended in FACS buffer  
498 and filtered by using a 30-micron filter followed by single-cell sorting using a BD FACS Aria II  
499 with a 100-µm nozzle running at 20 psi. PyCSP-specific class switched memory B cells  
500 (B220+ CD38+ IgM- IgD- antigen+ decoy- cells) were isolated and sorted as single cell per  
501 well into 96-well PCR plates. For the cDNA generation and the consequent IgG and IgK  
502 variable region amplification a previously described (von Boehmer et al., 2016) protocol was  
503 followed and the PCR amplified final heavy and light chain sequences were cloned by  
504 Gibson assembly into pcDNA3.4 expression vectors containing the murine IgG1 and IgK  
505 constant regions, respectively. The IgG and IgK plasmid DNA sequences were verified for  
506 the CDR3 sequences by Sanger sequencing and these plasmid pairs were diluted in PBS  
507 followed by addition of polyethyleneimine (Polysciences, Warrington, PA). After 15 mins of  
508 incubation at room temperature, the mixture was added to HEK293-F cells at a density of 1  
509 million cells per milliliter cultured for 5 days in mammalian FreeStyle™ at 37°C, 5% CO<sub>2</sub> on  
510 a shaker platform for mAb expression. The cells were separated from the supernatant by  
511 centrifugation at 4000 rpm for 20 mins at room temperature and the cell-free supernatant  
512 was passed over a HiTRAP MabSelect Sure column (GE Lifesciences #11003493) followed

513 by wash and elution steps performed as suggested by the manufacturer. The isolated mAbs  
514 were buffer exchanged into HBS-E (10 mM HEPES, pH 7, 2 mM EDTA ,150 mM NaCl) and  
515 the homogeneity and the size of the antibodies were analyzed by using an analytical  
516 Superdex 200 10/300 column (GE Healthcare, Chicago, IL, USA).

#### 517 **Tetramer production**

518 The following tetramers were made for antigen enrichment of splenocytes at an 8:1 ratio of  
519 protein to SA-fluorophore, based on protein biotinylation efficiency. Bio-*PyCSP* protein (38.3  
520 kDa) at 16  $\mu$ M was combined with SA-APC antibody (Biolegend) at 2  $\mu$ M. Bio-*PyS23* protein  
521 (44.8 kDa) at 16  $\mu$ M was combined with SA-APC/Fire750 antibody (Biolegend) at 2  $\mu$ M and  
522 was used as a decoy. To achieve optimal binding, an antibody was added to protein in two  
523 additions with 20 min incubations at room temperature following each addition.

#### 524 **Splenocyte isolation and Antigen-specific cell enrichment**

525 Splenocytes were isolated from fresh spleens by passing the tissue through a 70  $\mu$ m strainer  
526 and rinsing with splenocyte buffer (1X phosphate buffered saline (PBS) supplemented with  
527 2% fetal bovine serum (FBS), 100  $\mu$ g/mL DNase I (Sigma) and 5 mM MgCl<sub>2</sub>. Collected cells  
528 were spun down at 350 x g for 10 min and resuspended in the FACS buffer (1X PBS  
529 supplemented with 2% FBS). Fc block (BD Biosciences) was added to each sample at a  
530 1:100 dilution with decoy tetramer (Bio-*PyS23*, SA-APC/Fire750) and samples were  
531 incubated for 10 min at RT. Then the *PyCSP* tetramer (Bio-*PyCSP*, SA-APC) was added,  
532 and samples were incubated for 30 min at 4°C. After the incubation, cells were washed with  
533 FACS buffer and spun at 300x g for 10 min at 4°C. Anti-APC microbeads (Miltenyi Biotec) in  
534 FACS buffer were added and samples were incubated for 15 min at 4°C. After washing,  
535 magnetic separation of cells was performed with LS columns (Miltenyi Biotec) on a  
536 quadroMACS separator (Miltenyi Biotec). Cell suspensions were applied to a pre-separation  
537 30  $\mu$ m filter on separate LS columns. Untetramerized cells without magnetic beads that  
538 passed through the column were collected as flow through. Then the columns were removed  
539 from the quadroMACS magnet and magnetically labeled cells were flushed out with the  
540 FACS buffer and collected. Both the labeled and flow through fractions were spun at 300xg  
541 for 10 min and resuspended in the FACS buffer.

#### 542 **Antibody staining and flow cytometry**

543 The following antibody mixture was made and used to stain the flow through and labeled  
544 fractions: B220-BV510 (Biolegend) at 1:20, CD38-FITC (Biolegend) at 1:100, IgM-BV786  
545 (BD Biosciences) at 1:20, IgD-PerCPy5.5 (Biolegend) at 1:80, CD3-APC/Fire (Biolegend) at  
546 1:40, GL7-e450 (ThermoFisher) at 1:40, and CD138-BV605 (BD Biosciences) at 1:80.  
547 Samples were incubated on ice for 30 min, washed with FACS buffer and resuspended in

548 cold 1% paraformaldehyde (PFA) in PBS and stored overnight at 4°C until collection of  
549 events on the cytometer the following day. For compensation controls, cryopreserved  
550 splenocytes were removed from liquid nitrogen storage, quickly thawed at 37°C in water bath  
551 for 1 min, washed in RPMI media with DNase (RPMI 1640, Corning +10% FBS + 1:100  
552 Pen/strep + 2 mM L-glutamine +100 µg/mL DNase I + 5 mM MgCl<sub>2</sub>), passed through a 70  
553 µM cell strainer, washed again and finally resuspended in FACS buffer. Single stains  
554 controls were made with the following antibodies: B220-BV510 (Biolegend) at 1:20, CD38-  
555 FITC (Biolegend) at 1:100, IgM-BV786 (BD Biosciences) at 1:20, IgD-PercpCy5.5  
556 (Biolegend) at 1:80, CD3-APC/Fire (Biolegend) at 1:40, B220-APC (Biolegend) at 1:50,  
557 B220-e450 (ThermoFisher) at 1:33, and B220-BV605 (Biolegend) at 1:20. Samples were  
558 incubated for 25 min at 4°C then washed with the FACS buffer and resuspended in cold 1%  
559 PFA in PBS and stored at 4°C overnight. In the flowcytometry experiments to evaluate the  
560 number of specific B-cell populations. 1% PFA was added to a small portion of unstained,  
561 labeled and flow-through cells and reserved for cell count analysis. These samples were  
562 incubated overnight at 4°C followed by the addition of Accucheck beads (ThermoFisher) the  
563 following day and the events were collected on the cytometer. For quantification of specific  
564 B-cells an LSR II flow cytometer (BD Biosciences) was used, 1.5-2.5 million events were  
565 collected for each sample at a threshold of 15,000. A total of 50,000 events were collected  
566 for cell count analysis. All the data were analyzed using FlowJo software (FlowJo LLC).

### 567 **Biolayer interferometry (BLI)**

568 Biolayer interferometry (BLI) is used to test the antigen, antibody interactions using an  
569 Octet QK<sup>e</sup> instrument (ForteBio Inc., Menlo Park, CA, USA). Streptavidin (SA)  
570 biosensors (ForteBio Inc.,) were used to immobilize the biotinylated antigen or  
571 peptide, followed by incubation in 10X Kinetics Buffer (PBS+0.1% BSA, 0.02% Tween-20  
572 and 0.05% sodium azide). The antigen-derivatized probes were then dipped in indicated  
573 concentrations of antibodies in 10X Kinetics Buffer, respectively, followed by an incubation  
574 step in 10X Kinetics buffer to test the dissociation of the interactions. The  
575 resulting sensograms from the association and dissociation phases were normalized to the  
576 buffer values and analyzed by a global fit simple 1:1 binding model using the ForteBio data  
577 analysis software (version 7.0.1.5). The K<sub>D</sub> was determined from the estimated on- and off-  
578 rates of the samples.

### 579 **Fab generation**

580 The RAM2 Fabs were generated by papain digestion and purified using Immobilized papain  
581 agarose resin (Thermofisher Scientific) following manufacturer's protocol. Briefly 1 mg of  
582 RAM2 mAb in 400 µl of sample buffer (20 mM Sodium phosphate pH 7.0, 10 mM EDTA) is

583 mixed with 400 µl immobilized papain resin in digestion buffer (20 mM Sodium phosphate  
584 pH 7.0, 10 mM EDTA, 20 mM Cysteine.HCl) and incubated overnight on a rotatory shaker at  
585 37°C. Later 1.5 ml of Tris-HCl, pH 7.5 is added to the mixture followed by centrifugation at  
586 2000 x g for one minute at room temperature. The supernatant containing Fabs is separated  
587 from the immobilized agarose resin and is passed through a 0.22 µM spin column. Finally,  
588 the Fab fragments were isolated by negative selection on a HiTrap MabSelect SuRe  
589 cartridge with 10 column volumes of PBS, pH 7.4 and concentrated on spin column to  
590 desired concentration.

### 591 **Generation of infected *Anopheles stephensi* mosquitoes**

592 *P. yoelii* wild type strain 17XNL (BEI resources) was maintained in Swiss Webster (Envigo,  
593 SW) mice. Swiss Webster mice were injected intraperitoneal (i.p.) with 250 µL of infected  
594 blood at 3-5% parasitemia. Gametocyte exflagellation rate was checked 4 days post-  
595 injection. Mice were then anesthetized with 150 µL Ketamine Xylazine solution (12.5 mg/mL  
596 ketamine, 1.25 mg/mL xylazine in PBS) and naïve female *Anopheles stephensi* mosquitoes  
597 (3-7 days old) were allowed to feed on them. Mosquitos were maintained at 23°C, 80%  
598 humidity with a 12L-12D light cycle. On day ten, the midguts from ten mosquitoes were  
599 dissected and the number of oocysts was counted as a measure of infection. On day 15  
600 post-infection, the salivary glands of the mosquitoes were dissected to extract sporozoites.

### 601 **Mosquito Bite Challenge**

602 Mice were anesthetized by IP injection of 150 µL Ketamine Xylazine solution (12.5 mg/mL  
603 ketamine, 1.25 mg/mL xylazine in PBS). Once anesthetized pairs of mice were each placed  
604 on a carton of 15 infectious mosquitoes and mosquitoes were allowed to bite through the  
605 mesh top for 10 min. Every 30 sec mice were rotated among mosquito cartons to ensure  
606 equal exposure of mice and to maximize mosquito probing thereby sporozoite transfer. Mice  
607 received subcutaneous PBS injections and recovered from anesthesia under a heat lamp.  
608 Mice were checked for the presence of blood-stage parasites (patency) beginning four days  
609 post-challenge.

### 610 **Assessment of blood stage patency**

611 Patency was checked daily by blood smear 4 days post-infection by tail snip. Slides were  
612 fixed in methanol, dried, and then stained with giemsa (1:5 in H<sub>2</sub>O) for 10 min and viewed at  
613 100X oil immersion on a compound microscope and twenty fields of view examined for each  
614 smear. Mice were considered patent if 2 or more ring stage parasites were observed.

### 615 **Sporozoite quantification**

616 To quantify the number of sporozoites per mosquito, 10-12 mosquitoes' salivary glands were  
617 hand dissected. These glands were then ground with a pestle and spun at 800 rpm to pellet  
618 debris. Sporozoites were counted on a hemocytometer.

### 619 **Invasion and traversal assay**

620 Freshly isolated sporozoites were exposed to 2F6, RAM2, RAM1 or serum antibodies from  
621 PyCSP immunized BALB/cJ and C57BL/6J mice for 10 mins at indicated concentrations.  
622  $5 \times 10^5$  Hepa1-6 cells were seeded in each well of a 24-well plate (Corning) and infected with  
623 antibody exposed *P. yoelii* sporozoites at a multiplicity of infection (MOI)=0.25 for 90 mins.  
624 Cells were co-incubated with high molecular mass Dextran-FITC (70 kDa) (Sigma). After 90  
625 mins of infection, cells were harvested with accutase (Life Technologies) and fixed with  
626 Cytoperm/Cytofix (BD Biosciences). Cells were blocked with Perm/Wash (BD Biosciences) +  
627 2% BSA for 1 h at room temperature then stained overnight at 4°C with antibodies to CSP-  
628 Alexafluor 488 conjugate. The cells were then washed and resuspended in PBS-containing 5  
629 mM EDTA. Infection rate was measured by flow cytometry (Douglass et al., 2015) on an  
630 LSRII (Becton-Dickinson) and analyzed by FlowJo (Tree Star).

### 631 **Immunofluorescence**

632 Freshly isolated sporozoites were exposed to 2F6, RAM2, RAM1 or serum antibodies from  
633 PyCSP immunized BALB/cJ and C57BL/6J mice for 10 mins at indicated concentrations.  
634 Sporozoites were spun at 17000g for 5 mins and washed with 1xPBS-EDTA and fixed with  
635 3.7% PFA for 20 mins. Sporozoites were transferred to 8-well chambered slides and the  
636 images were acquired with a 100x1.4 NA objective (Olympus) on a DeltaVision Elite High-  
637 Resolution Microscope (GE Healthcare Life Sciences). The sides of each pixel represent  
638 64.5x64.5 nm and z-stacks were acquired at 300 nm intervals. Approximately 5-15 slices  
639 were acquired per image stack. For deconvolution, the 3D data sets were processed to  
640 remove noise and reassign blur by an iterative Classic Maximum Likelihood Estimation  
641 widefield algorithm provided by Huygens Professional Software (Scientific Volume Imaging,  
642 The Netherlands).

### 643 **Next-generation sequencing (NGS)**

644 CSP-specific MBCs were sorted into RLT buffer supplemented with 2-mercaptoethanol and  
645 then IgG gamma chain was amplified by 5' Rapid amplification of cDNA ends (5'RACE)  
646 followed by sequencing on an Illumina MiSeq instrument generating the entire V, D, J  
647 rearrangements (Doepker et al., 2020; Simonich et al., 2019; Vigdorovich et al., 2016).  
648 Briefly, cell lysate was homogenized using QIAshredder columns (Qiagen, #79654). RNA  
649 was extracted from homogenized lysate containing a range of  $3 \times 10^3$  to  $1 \times 10^5$  cells per  
650 sample using a RNeasy Mini kit (Qiagen, #80204). RNA was purified and

651 concentrated using RNAClean XP beads (Beckman Coulter, #A63987). The concentration  
652 and quality of the RNA was determined by an Agilent 2100 Bioanalyzer with the Agilent RNA  
653 6000 Pico Kit (Agilent Technologies, #5067-1513). The oligonucleotides used for the NGS  
654 were tabulated (Table 1). Up to 1 µg of RNA was mixed with a gamma chain reverse primer  
655 (vv-534- TGCATTTGAACTCCTTGCC) and incubated at 72°C for 3 min to denature the  
656 RNA, then cooled to 42°C to anneal the synthesis primer. cDNA was generated by mixing 5x  
657 First-Strand Buffer, DTT (20 mM), dNTP mix (ThermoFisher, #18427-013, 10 mM), a  
658 template switch adaptor with UMI tag (vv-877-  
659 AAGCAGUGGTAUCAACGCAGAGNNNNUNNNNUNNNNUNNNNUCTTGrGrG),  
660 Recombinant RNase Inhibitor (Takara Bio/Clontech, #2313A, 40 U/ul), and SMARTScribe  
661 RT (Takara Bio/Clontech, #639536, 100 U/ul) with the denatured RNA and incubating for 90  
662 min at 42°C then heating to 70°C for 10 min. Uracil-DNA glycosylase (NEB, #M0280S, 5  
663 U/ul) was added and the reaction was incubated for 1 h at 37°C. RNAClean XP beads were  
664 used to purify and concentrate the reaction. A polymerase chain reaction (PCR) was  
665 performed to generate variable libraries using cDNA with primers vv-869-  
666 AAGCAGTGGTATCAACGCAG, vv-870-KKACAGTCACTGAGCTGCT, vv-872-  
667 TACAGTCACCAAGCTGCT, and Q5 2x Master Mix (NEB, #M0492S). The reaction was  
668 incubated for 30 sec at 98°C, then cycled 18 times at 98°C for 10 sec, 63°C for 30 sec, and  
669 72°C for 30 sec, and finally incubated at 72°C for 5 min. A cleanup step was performed with  
670 SPRI beads (Beckman Coulter, #B23318). The second PCR was performed with primers  
671 vv873-CACTCTATCCGACAAGCAGTGGTATCAACG, vv874-GGGCCAGTGGATAGAC,  
672 vv876-GGGACCAAGGGATAGAC and Q5 Master Mix. The reaction was incubated using  
673 the same conditions as the first PCR, but with an annealing temperature of 60°C and only 8-  
674 15 amplification cycles. Another clean up step was performed with SPRI beads. After the  
675 second PCR, the NEB Library Prep protocol of the manufacturer was followed and samples  
676 were adaptor ligated using the NEBNext End Prep kit (NEB, #E7645). The adaptor-ligated  
677 DNA fragments were indexed with the NEBNext Multiplex Oligos for Illumina kit (NEB,  
678 E7335). Adapted and indexed libraries were quantified using a KAPA Library Quantification  
679 Kit (Roche, KK4873) on a QuantStudio3 Real Time PCR System (ThermoFisher, #A28567).  
680 Quantified libraries were pooled to a concentration of 4 nM and denatured following the  
681 MiSeq Guide (2). Libraries were denatured in 0.2 N NaOH and diluted to 20 pM. As a  
682 sequencing control, PhiX Control V3 (Illumina, #FC-110-3001) was denatured and diluted to  
683 20 pM and was added to the pooled library sample at a 1% spike in. The pooled library  
684 sample plus PhiX was sequenced using the MiSeq Reagent Kit v3 (Illumina, #MS-102-3003)  
685 on the Illumina MiSeq system.

686 Raw Illumina MySeq reads were processed using an approach similar to the one previously  
687 described (Vigdorovich et al., 2016) with several modifications to utilize unique molecular  
688 identifier (UMI)-based error correction (Turchaninova et al., 2016). Briefly, following the  
689 amplicon reconstruction and oligonucleotide trimming, UMI sequences were identified and  
690 used to collect sequences into molecular identifier groups (MIGs), representing PCR-  
691 amplified mRNA molecules. Consensus sequence for each MIG was then determined using  
692 the approach adapted from the MIGEC pipeline (Shugay et al., 2014), in which the MIG is  
693 first represented by a position frequency matrix, followed by base calling and calculation of a  
694 cumulative quality score for each position. Resulting sequence sets were annotated using  
695 IgBLAST (version 1.11.0) (Ye et al., 2013) against a custom database of mouse germline  
696 sequences obtained from the IMGT/GENE-DB collection (Giudicelli et al., 2005)  
697 ([www.imgt.org](http://www.imgt.org)) to determine segment boundaries (e.g., to define CDR3 regions), identify  
698 closest germline matches and derive sequence-identity-to-germline values. In order to  
699 eliminate multiple identical transcripts likely originating from the same B cell, sequence set  
700 deduplication was carried out using VSEARCH (Rognes et al., 2016) (version 2.9.1) at 100%  
701 sequence identity. In the finalized deduplicated data sets, only sequences that were  
702 supported by  $\geq 10$  raw reads were used in further analysis. The visualizations were  
703 generated using the ggstatsplot (version 0.7.2) R package.

#### 704 **Acknowledgments**

705 We thank the vivarium staff at the Seattle Children's Research Institute for their support and  
706 ongoing care of research animals. The authors gratefully acknowledge Rossana de la Noval  
707 for administrative and logistical support of this work. This study was funded by a Medical  
708 Research Grant from the W.M. Keck Family Foundation to A.K and D.N.S.

#### 709 **Author Contributions**

710 GRRV, KV, RC, OT, SLW, VV, AY, AR, AW, WS, MZ, and ND conducted experiments and  
711 analyzed data. RC, GRRV, KV, MZ, AK, and DNS developed the experimental plan and  
712 designed experiments. GRRV, KV, AK, and DNS wrote the manuscript, and all authors  
713 edited initial drafts. AK and DNS conceived of the study and obtained funding.

714

## 715 **Figure Legends**

716 **Figure 1. The *PyCSP*-immunization in BALB/cJ and C57BL/6J mice delays blood stage**  
717 **patency and confers protection only in the prior. A.** The immunization and challenge  
718 regimen are illustrated. 6-8 weeks old female BALB/cJ (n=10) and C57BL/6J (n=10) mice  
719 were intramuscularly immunized with 20 µg of *PyCSP* formulated with 20% adjuvax on  
720 weeks 0, 2 and 6 (arrows) followed by *Py* sporozoites-bearing mosquito bite challenge (15  
721 mosquitoes/mouse) on week 7. Post challenge the blood smears were collected from the tail  
722 vein for up to 3 weeks to monitor blood-stage patency by Giemsa stain. Submandibular  
723 bleeds were performed in Week 3 and on week 7 (before challenge). **B.** BALB/cJ and  
724 C57BL/6J were immunized with *PyCSP* at 0, 2 and 6 weeks. A week post final boost, mice  
725 were challenged with *P. yoelii* infected mosquitoes and patency was assessed from day 3  
726 through day 21. The Kaplan-Meier Survival plots represent percentage parasitemia free mice  
727 over time. Data are from 10 mice /condition across 2 independent experiments. The control,  
728 *PyCSP*-immunized BALB/cJ and C57BL/6J mice are indicated in green, orange, blue and  
729 red, respectively. The numeric indicates that 6 out of 10 *PyCSP*-immunized BALB/cJ mice  
730 were parasitemia free. **C.** Representative immunofluorescent images of *P. yoelii* sporozoites  
731 incubated with purified serum antibodies from post week 7- *PyCSP*-immunized BALB/cJ and  
732 C57BL/6J mice for 10 min. *PyCSP* monoclonal antibody, 2F6, is used as control for CSP  
733 trailing assay and DAPI is used to stain the nucleus of the sporozoites. The arrowhead  
734 points to the regions of CSP reaction or shedding (CSPR). **(D and E)** Freshly isolated  
735 sporozoites were pre-incubated with *PyCSP*-immunized BALB/cJ and C57BL/6J serum  
736 antibodies were incubated with *Py* sporozoites (1:1 dilution) for 20 mins. Normal mouse  
737 serum (NMS) is used as infection control for *in vitro* assays. Hepa 1-6 cells were infected  
738 with antibody-treated sporozoites for 90 min to assess hepatocyte entry. The bar graph here  
739 represents the percentage of hepatocytes that were CSP-positive as evaluated by flow  
740 cytometry **(D)**. Antibody-treated sporozoites were exposed to HFF-1 cells in the presence of  
741 Dextran-FITC for 30 mins. The bar graph represents the percentage of cells traversed as  
742 assessed by dextran positive cells **(E)**. For **(D)** and **(E)**, data represents mean values ± SE  
743 from three independent experiments: n=3. p values were determined by comparing each  
744 treatment to untreated using one-way ANOVA for multiple comparisons tests. **F.** Polyclonal  
745 antibodies from *PyCSP*-immunized BALB/cJ and C57BL/6J mice sera were purified and  
746 *PyCSP*-specific antibodies were quantified by ELISA. Naïve BALB/cJ (n=5) and C57BL/6J  
747 (n=9) were passively transferred (i.p.) with 90 µg of *PyCSP* antibodies from *PyCSP*-  
748 immunized C57BL/6J (blue) and BALB/cJ (red) mice, respectively. Post five days of antibody  
749 passive transfer mice were challenged with mosquito-bites from 15 *Py*-infected mosquitoes  
750 and the blood stage patency is monitored for 2 weeks. Naïve BALB/cJ (n=5) and C57BL/6J



751 (n=5) that were passively transferred with purified polyclonal antibodies from naïve  
752 C57BL/6J (light blue) and BALB/cJ (orange) mice, respectively were used as controls. Data  
753 analyzed by Two-way ANOVA and p values were obtained by Tukey's multiple comparison  
754 test. \*\*\*  $p < 0.0004$ ; \*\*  $p < 0.005$ ; \*  $p < 0.0005$ ; ns- not significant.

755 **Figure 2. Comparison of antibody responses after immunization of PyCSP at week 3**  
756 **and 7 time points in BALB/cJ and C57BL/6J mice. A.** 6-8 weeks old female BALB/cJ  
757 (n=5) (blue) and C57BL/6J (n=5) (red) mice were intramuscularly immunized with 20  $\mu$ g of  
758 PyCSP with 20% adjuvax on weeks 0, 2 and 6 and the blood samples were collected on  
759 week 3 and week 7. ELISA was performed to analyze the PyCSP-specific total IgG titers. **B.**  
760 Cartoon representing the domain organization of mature PyCSP ectodomain. The N- and C-  
761 terminal domains are represented as NT and CT, respectively. The TSR (RII) domain is in  
762 CT. The major and minor repeats of the repeat domain are colored blue and green,  
763 respectively and their respective amino acid repeat sequences are illustrated. The QEPP  
764 amino acid sequence connecting the major and minor repeat regions is indicated in red. The  
765 binding epitopes of anti-PyCSP mAbs RAM1, RAM2 and 2F6 are indicated with arrows. **C**  
766 and **D.** PyCSP-specific IgG titers of PyCSP-immunized BALB/cJ (blue) and C57BL/6J (red)  
767 mice to the major and minor repeats at Week 3 (**2C**) and Week 7 (**2D**) were analyzed. **E.**  
768 The avidity of the PyCSP-immunization elicited antibodies to the PyCSP antigen at weeks 3  
769 and 7 in BALB/cJ (blue) and C57BL/6J (red) mice were analyzed. Avidity index is calculated  
770 by (AUC of NH<sub>4</sub>SCN wells)/ (AUC of PBS wells)\*100. Data analyzed by Two-way ANOVA  
771 and p values were obtained by Tukey's multiple comparison test. \*\*\*\* $p < 0.0001$ ; \*\*\* $p < 0.0004$   
772 \*\* $p < 0.005$ ; ns- not significant.

773 **Figure 3. PyCSP mAb RAM2 avidly binds to major repeat regions of PyCSP and**  
774 **provides sterile liver stage protection from the pathogen. A.** ELISA showing the binding  
775 of RAM2 to the PyCSP full length protein (black), the major repeat peptide (dark green) but  
776 not to the minor repeat peptide (light green). **B.** ELISA showing the EC<sub>50</sub> of RAM2 (orange)  
777 and 2F6 (pink) binding to PyCSP full length protein **C.** Biotinylated-PyCSP (5  $\mu$ g) derivatized  
778 streptavidin biosensors were incubated in different mAbs (RAM1 (cyan), RAM2 (orange) 2F6  
779 (pink) and 50C1 (black), 5  $\mu$ g each) and the association and dissociation kinetics were  
780 assayed by Octet-BLI **D.** Biotinylated-major repeat peptide (5  $\mu$ g) loaded streptavidin  
781 biosensors were dipped in 5  $\mu$ g each of mAbs (RAM1-cyan, RAM2-orange, 2F6-pink and  
782 50C1-black) and the association and dissociation kinetics were assayed by Octet-BLI. **E.**  
783 Representative immunofluorescent images of *P. yoelii* sporozoites incubated with mAb RAM2  
784 (10  $\mu$ g) for 10 min. PyCSP mAb, 2F6, is used as control for CSP trailing assay and DAPI is  
785 used to stain the nucleus of the sporozoites. The arrowhead points to the regions of CSP

786 reaction or shedding (CSPR). **F.** Freshly isolated sporozoites were pre-incubated with (10 µg)  
787 of RAM2 (orange), 2F6 (pink) and normal mouse serum (black) antibodies for 10 mins. Hepa  
788 1-6 cells were infected with antibody-treated sporozoites for 90 min to assess hepatocyte  
789 entry. The bar graph here represents the percentage of hepatocytes that were CSP-positive  
790 as evaluated by flow cytometry. The data represents mean values ± SE from three  
791 independent experiments: n=3. p values were determined by comparing each treatment to  
792 untreated using one-way ANOVA for multiple comparisons tests. **G.** BALB/cJ were injected  
793 with 150 µg of RAM2 (orange) or 2F6 (pink) intraperitoneally. Naïve BALB/cJ (black) mice  
794 injected with PBS is used as control. After 24 h, mice were challenged with bites from fifteen  
795 *P. yoelii* infected mosquitoes and patency was assessed from day 4 through day 14. Kaplan-  
796 Meier survival plot represents percentage parasitemia free mice over time, including 10 mice  
797 from 2 independent experiments.

798 **Figure 4. PyCSP-specific B-cell responses of BALB/cJ and C57BL/6J mice at weeks 3**  
799 **and 7.** 6-8 weeks old female BALB/cJ (n=5) and C57BL/6J (n=5) mice were immunized  
800 intramuscularly with 20 µg of PyCSP adjuvanted with 20% adjuvax on weeks 0, 2 (Week 3)  
801 or weeks 0, 2 and 6 (week 7) and the splenocytes were isolated either on week 3 or week 7  
802 as described in the materials and methods. Cartoon representing the general workflow in B-  
803 cell population analysis is illustrated (Figure S4). B-cells responses of different B-cell  
804 populations per spleen were quantified for PyCSP-specific B-cells (**A**), IgM memory B-cells  
805 (MBCs) (**B**), class-switched (sw) Ig+MBCs (**C**), and Germinal center (GC) B-cells (**D**). Data  
806 analyzed by Two-way ANOVA and p values were obtained by Tukey's multiple comparison  
807 test. \*\*\*\* $p < 0.0001$ .

808 **Figure 5. PyCSP-immunized BALB/cJ mice employ more highly diverse V-gene**  
809 **rearrangements than C57BL/6J.** Somatic hypermutations in the V-gene of IgG heavy  
810 chains of PyCSP-specific mouse memory B-cells at Week 3 (orange, post 2<sup>nd</sup>) and 7 (purple,  
811 post 3<sup>rd</sup>) performed by high throughput cell sorting and NGS in BALB/cJ (**A**) and C57BL/6J  
812 (**B**) mice. The unimmunized mice (green) in a similar age group of the week 7 vaccinated  
813 mice were used as controls. The results are representative of three independent  
814 experiments (n=5/group). Each data point represents a sequence containing deduplicated  
815 members (i.e., 100% identity) and supported by at least 10 raw reads. The visualizations  
816 were analyzed and generated using the ggstatsplot (version 0.7.2) R package.

817 **Figure S1. A.** Graphics showing the statistical significance of PyCSP-immunized BALB/cJ  
818 (blue), C57BL/6J (red) and their respective placebo controls in green and yellow. **B.**  
819 Statistics showing the significance of the delay in blood stage patency in swapped PyCSP-  
820 pAbs (90 µg)-infused BALB/cJ (blue), C57BL/6J (red) and their respective placebo controls

821 in green and yellow. The days to patency are measured and the number of mice that are  
822 sterile protected in the *PyCSP*-immunized BALB/cJ mice **(A)** and *PyCSP*-immunized  
823 BALB/cJ mice pAbs infused naïve C57BL/6J mice **(B)** were indicated. Data analyzed by  
824 Two-way ANOVA and p values were obtained by Tukey's multiple comparison test. \*\*\*  
825  $p < 0.0004$ ; \*\* $p < 0.005$ ; \* $p < 0.0005$ ; ns- not significant

826 **Figure S2. IgG subclass differences between the *PyCSP*-immunized BALB/cJ and**  
827 **C57BL/6J mice.** The plasma IgG1, IgG2a (only for BALB/cJ) and IgG2b antibody responses  
828 of *PyCSP*-immunized BALB/cJ (black circles) and C57BL/6J (black squares) mice at week 7  
829 (pre-challenge) were measured by ELISA using biotinylated *PyCSP* as ligand. Data  
830 analyzed by Two-way ANOVA and p values were obtained by Sidak's multiple comparisons  
831 test. \*\*\*\* $p < 0.0001$

832 **Figure S3. RAM2 Fab association and dissociation kinetics.** Streptavidin biosensors  
833 loaded with *N*-terminally biotinylated-major repeat peptides were incubated in different  
834 concentrations of RAM2 Fab ranging from 7500 nM to 625 nM and the association and  
835 dissociation kinetics were analyzed. The resulting association and dissociation sensorgrams  
836 were analyzed by a global fit 1:1 binding model using the ForteBio data analysis software  
837 (version 7.0.1.5) generating  $K_D$  as estimated from the on- and off-rates.

838 **Figure S4.** Summary of the workflow showing the different steps involved in the  
839 quantification of CSP-specific B-cell responses as described in the Materials and Methods  
840 section.

841 **Figure S5.** The CDRH3 amino acids (aa) lengths and density of **(A)** *PyCSP*-specific MBCs  $\gamma$   
842 chain sequences from naïve animals (lavender), and after two (peach) or three (green)  
843 immunizations in BALB/cJ mice, and **(B)** from C57BL/6J mice. The results are representative  
844 of three independent experiments (n=5/group).

845 **Table 1. Oligonucleotides used in the NGS experiment**

| Primer Name | Sequence                                                |
|-------------|---------------------------------------------------------|
| vv-534      | TGCATTTGAACTCCTTGCC                                     |
| vv-877      | AAGCAGUGGTAUCAACGCAGAGNNNUNNNUNNNUNNNUNNNUNNNUCTTrGrGrG |
| vv-869      | AAGCAGTGGTATCAACGCAG                                    |
| vv-870      | KKACAGTCACTGAGCTGCT                                     |
| vv-872      | TACAGTACCAAGCTGCT                                       |
| vv-873      | CACTCTATCCGACAAGCAGTGGTATCAACG                          |
| vv-874      | GGGCCAGTGGATAGAC                                        |
| vv-876      | GGGACCAAGGGATAGAC                                       |

846

847 **References:**

- 848 Alexander, M.R., Ringe, R., Sanders, R.W., Voss, J.E., Moore, J.P., and Klasse, P.J. (2015).  
849 What Do Chaotrope-Based Avidity Assays for Antibodies to HIV-1 Envelope Glycoproteins  
850 Measure? *J Virol* 89, 5981-5995.
- 851 Aliprandini, E., Tavares, J., Panatieri, R.H., Thiberge, S., Yamamoto, M.M., Silvie, O., Ishino,  
852 T., Yuda, M., Darteville, S., Traincard, F., *et al.* (2018). Cytotoxic anti-circumsporozoite  
853 antibodies target malaria sporozoites in the host skin. *Nat Microbiol* 3, 1224-1233.
- 854 Balaban, A.E., Kanatani, S., Mitra, J., Gregory, J., Vartak, N., Sinnis-Bourozikas, A.,  
855 Frischknecht, F., Ha, T., and Sinnis, P. (2021). The repeat region of the circumsporozoite  
856 protein is an elastic linear spring with a functional role in *Plasmodium* sporozoite  
857 motility. *bioRxiv*, 2021.2005.2012.443759.
- 858 Benhnini, F., Chenik, M., Laouini, D., Louzir, H., Cazenave, P.A., and Dellagi, K. (2009).  
859 Comparative evaluation of two vaccine candidates against experimental leishmaniasis due  
860 to *Leishmania major* infection in four inbred mouse strains. *Clin Vaccine Immunol* 16, 1529-  
861 1537.
- 862 Bruna-Romero, O., Rocha, C.D., Tsuji, M., and Gazzinelli, R.T. (2004). Enhanced protective  
863 immunity against malaria by vaccination with a recombinant adenovirus encoding the  
864 circumsporozoite protein of *Plasmodium* lacking the GPI-anchoring motif. *Vaccine* 22, 3575-  
865 3584.
- 866 Burrows, J.N., Duparc, S., Gutteridge, W.E., Hooft van Huijsduijnen, R., Kaszubska, W.,  
867 Macintyre, F., Mazzuri, S., Mohrle, J.J., and Wells, T.N.C. (2017). New developments in anti-  
868 malarial target candidate and product profiles. *Malar J* 16, 26.
- 869 Camponovo, F., Campo, J.J., Le, T.Q., Oberai, A., Hung, C., Pablo, J.V., Teng, A.A., Liang,  
870 X., Sim, B.K.L., Jongo, S., *et al.* (2020). Proteome-wide analysis of a malaria vaccine study  
871 reveals personalized humoral immune profiles in Tanzanian adults. *Elife* 9.
- 872 Collins, K.A., Brod, F., Snaith, R., Ulaszewska, M., Longley, R.J., Salman, A.M., Gilbert,  
873 S.C., Spencer, A.J., Franco, D., Ballou, W.R., *et al.* (2021). Ultra-low dose immunization and  
874 multi-component vaccination strategies enhance protection against malaria in mice. *Sci Rep*  
875 11, 10792.
- 876 Dattoo, M.S., Natama, M.H., Some, A., Traore, O., Rouamba, T., Bellamy, D., Yameogo, P.,  
877 Valia, D., Tegneri, M., Ouedraogo, F., *et al.* (2021). Efficacy of a low-dose candidate malaria  
878 vaccine, R21 in adjuvant Matrix-M, with seasonal administration to children in Burkina Faso:  
879 a randomised controlled trial. *Lancet* 397, 1809-1818.
- 880 Doepker, L.E., Simonich, C.A., Ralph, D., Shipley, M.M., Garrett, M., Gobillot, T.,  
881 Vigdorovich, V., Sather, D.N., Nduati, R., Matsen, F.A.t., *et al.* (2020). Diversity and Function  
882 of Maternal HIV-1-Specific Antibodies at the Time of Vertical Transmission. *J Virol* 94.
- 883 Douglass, A.N., Metzger, P.G., Kappe, S.H.I., and Kaushansky, A. (2015). Flow Cytometry-  
884 Based Assessment of Antibody Function Against Malaria Pre-erythrocytic Infection. In  
885 *Malaria Vaccines: Methods and Protocols*, A. Vaughan, ed. (New York, NY: Springer New  
886 York), pp. 49-58.
- 887 Epstein, J.E., Tewari, K., Lyke, K.E., Sim, B.K., Billingsley, P.F., Laurens, M.B., Gunasekera,  
888 A., Chakravarty, S., James, E.R., Sedegah, M., *et al.* (2011). Live attenuated malaria  
889 vaccine designed to protect through hepatic CD8(+) T cell immunity. *Science* 334, 475-480.
- 890 Ewer, K.J., O'Hara, G.A., Duncan, C.J., Collins, K.A., Sheehy, S.H., Reyes-Sandoval, A.,  
891 Goodman, A.L., Edwards, N.J., Elias, S.C., Halstead, F.D., *et al.* (2013). Protective CD8+ T-  
892 cell immunity to human malaria induced by chimpanzee adenovirus-MVA immunisation. *Nat*  
893 *Commun* 4, 2836.
- 894 Ewer, K.J., Sierra-Davidson, K., Salman, A.M., Illingworth, J.J., Draper, S.J., Biswas, S., and  
895 Hill, A.V. (2015). Progress with viral vectored malaria vaccines: A multi-stage approach  
896 involving "unnatural immunity". *Vaccine* 33, 7444-7451.
- 897 Ghosh, A.K., and Jacobs-Lorena, M. (2009). *Plasmodium* sporozoite invasion of the  
898 mosquito salivary gland. *Curr Opin Microbiol* 12, 394-400.

- 899 Giudicelli, V., Chaume, D., and Lefranc, M.P. (2005). IMGT/GENE-DB: a comprehensive  
900 database for human and mouse immunoglobulin and T cell receptor genes. *Nucleic Acids*  
901 *Res* 33, D256-261.
- 902 Jongo, S.A., Shekalaghe, S.A., Church, L.W.P., Ruben, A.J., Schindler, T., Zenklusen, I.,  
903 Rutishauser, T., Rothen, J., Tumbo, A., Mkindi, C., *et al.* (2018). Safety, Immunogenicity,  
904 and Protective Efficacy against Controlled Human Malaria Infection of Plasmodium  
905 falciparum Sporozoite Vaccine in Tanzanian Adults. *Am J Trop Med Hyg* 99, 338-349.
- 906 Kisalu, N.K., Idris, A.H., Weidle, C., Flores-Garcia, Y., Flynn, B.J., Sack, B.K., Murphy, S.,  
907 Schön, A., Freire, E., Francica, J.R., *et al.* (2018). A human monoclonal antibody prevents  
908 malaria infection by targeting a new site of vulnerability on the parasite. *Nat Med* 24, 408-  
909 416.
- 910 Kuipers, K., van Selm, S., van Opzeeland, F., Langereis, J.D., Verhagen, L.M.,  
911 Diavatopoulos, D.A., and de Jonge, M.I. (2017). Genetic background impacts vaccine-  
912 induced reduction of pneumococcal colonization. *Vaccine* 35, 5235-5241.
- 913 Miller, J.L., Sack, B.K., Baldwin, M., Vaughan, A.M., and Kappe, S.H.I. (2014). Interferon-  
914 mediated innate immune responses against malaria parasite liver stages. *Cell Rep* 7, 436-  
915 447.
- 916 Mordmuller, B., Surat, G., Lagler, H., Chakravarty, S., Ishizuka, A.S., Lalremruata, A.,  
917 Gmeiner, M., Campo, J.J., Esen, M., Ruben, A.J., *et al.* (2017). Sterile protection against  
918 human malaria by chemoattenuated PfSPZ vaccine. *Nature* 542, 445-449.
- 919 Murugan, R., Buchauer, L., Triller, G., Kreschel, C., Costa, G., Pidelaserra Martí, G.,  
920 Imkeller, K., Busse, C.E., Chakravarty, S., Sim, B.K.L., *et al.* (2018). Clonal selection drives  
921 protective memory B cell responses in controlled human malaria infection. *Sci Immunol* 3.  
922 Olotu, A., Fegan, G., Wambua, J., Nyangweso, G., Leach, A., Lievens, M., Kaslow, D.C.,  
923 Njuguna, P., Marsh, K., and Bejon, P. (2016). Seven-Year Efficacy of RTS,S/AS01 Malaria  
924 Vaccine among Young African Children. *N Engl J Med* 374, 2519-2529.
- 925 Pullen, G.R., Fitzgerald, M.G., and Hosking, C.S. (1986). Antibody avidity determination by  
926 ELISA using thiocyanate elution. *J Immunol Methods* 86, 83-87.
- 927 Rognes, T., Flouri, T., Nichols, B., Quince, C., and Mahe, F. (2016). VSEARCH: a versatile  
928 open source tool for metagenomics. *PeerJ* 4, e2584.
- 929 Sack, B.K., Miller, J.L., Vaughan, A.M., Douglass, A., Kaushansky, A., Mikolajczak, S.,  
930 Coppi, A., Gonzalez-Aseguinolaza, G., Tsuji, M., Zavala, F., *et al.* (2014). Model for in vivo  
931 assessment of humoral protection against malaria sporozoite challenge by passive transfer  
932 of monoclonal antibodies and immune serum. *Infect Immun* 82, 808-817.
- 933 Scally, S.W., Murugan, R., Bosch, A., Triller, G., Costa, G., Mordmuller, B., Kremsner, P.G.,  
934 Sim, B.K.L., Hoffman, S.L., Levashina, E.A., *et al.* (2018). Rare PfCSP C-terminal antibodies  
935 induced by live sporozoite vaccination are ineffective against malaria infection. *J Exp Med*  
936 215, 63-75.
- 937 Shugay, M., Britanova, O.V., Merzlyak, E.M., Turchaninova, M.A., Mamedov, I.Z.,  
938 Tuganbaev, T.R., Bolotin, D.A., Staroverov, D.B., Putintseva, E.V., Plevova, K., *et al.* (2014).  
939 Towards error-free profiling of immune repertoires. *Nat Methods* 11, 653-655.
- 940 Simonich, C.A., Doepker, L., Ralph, D., Williams, J.A., Dhar, A., Yaffe, Z., Gentles, L., Small,  
941 C.T., Oliver, B., Vigdorovich, V., *et al.* (2019). Kappa chain maturation helps drive rapid  
942 development of an infant HIV-1 broadly neutralizing antibody lineage. *Nat Commun* 10,  
943 2190.
- 944 Sissoko, M.S., Healy, S.A., Katile, A., Omaswa, F., Zaidi, I., Gabriel, E.E., Kamate, B.,  
945 Samake, Y., Guindo, M.A., Dolo, A., *et al.* (2017). Safety and efficacy of PfSPZ Vaccine  
946 against Plasmodium falciparum via direct venous inoculation in healthy malaria-exposed  
947 adults in Mali: a randomised, double-blind phase 1 trial. *Lancet Infect Dis* 17, 498-509.
- 948 Stoute, J.A., Slaoui, M., Heppner, D.G., Momin, P., Kester, K.E., Desmons, P., Wellde, B.T.,  
949 Garçon, N., Krzych, U., and Marchand, M. (1997). A preliminary evaluation of a recombinant  
950 circumsporozoite protein vaccine against Plasmodium falciparum malaria. RTS,S Malaria  
951 Vaccine Evaluation Group. *N Engl J Med* 336, 86-91.
- 952 Sun, P., Schwenk, R., White, K., Stoute, J.A., Cohen, J., Ballou, W.R., Voss, G., Kester,  
953 K.E., Heppner, D.G., and Krzych, U. (2003). Protective immunity induced with malaria

954 vaccine, RTS,S, is linked to Plasmodium falciparum circumsporozoite protein-specific CD4+  
955 and CD8+ T cells producing IFN-gamma. *J Immunol* 171, 6961-6967.

956 Tan, J., Sack, B.K., Oyen, D., Zenklusen, I., Piccoli, L., Barbieri, S., Foglierini, M., Fregni,  
957 C.S., Marcandalli, J., Jongo, S., *et al.* (2018). A public antibody lineage that potently inhibits  
958 malaria infection through dual binding to the circumsporozoite protein. *Nat Med* 24, 401-407.

959 Thai, E., Costa, G., Weyrich, A., Murugan, R., Oyen, D., Flores-Garcia, Y., Prieto, K., Bosch,  
960 A., Valleriani, A., Wu, N.C., *et al.* (2020). A high-affinity antibody against the CSP N-terminal  
961 domain lacks Plasmodium falciparum inhibitory activity. *J Exp Med* 217.

962 Triller, G., Scally, S.W., Costa, G., Pissarev, M., Kreschel, C., Bosch, A., Marois, E., Sack,  
963 B.K., Murugan, R., Salman, A.M., *et al.* (2017). Natural Parasite Exposure Induces  
964 Protective Human Anti-Malarial Antibodies. *Immunity* 47, 1197-1209 e1110.

965 Turchaninova, M.A., Davydov, A., Britanova, O.V., Shugay, M., Bikos, V., Egorov, E.S.,  
966 Kirgizova, V.I., Merzlyak, E.M., Staroverov, D.B., Bolotin, D.A., *et al.* (2016). High-quality full-  
967 length immunoglobulin profiling with unique molecular barcoding. *Nat Protoc* 11, 1599-1616.

968 Vanderberg, J., Nussenzweig, R., and Most, H. (1969). Protective immunity produced by the  
969 injection of x-irradiated sporozoites of Plasmodium berghei. V. In vitro effects of immune  
970 serum on sporozoites. *Mil Med* 134, 1183-1190.

971 Vigdorovich, V., Oliver, B.G., Carbonetti, S., Dambrauskas, N., Lange, M.D., Yacoob, C.,  
972 Leahy, W., Callahan, J., Stamatatos, L., and Sather, D.N. (2016). Repertoire comparison of  
973 the B-cell receptor-encoding loci in humans and rhesus macaques by next-generation  
974 sequencing. *Clin Transl Immunology* 5, e93.

975 Vijayan, K., Visweswaran, G.R.R., Chandrasekaran, R., Trakhimets, O., Brown, S.L.,  
976 Watson, A., Zuck, M., Dambrauskas, N., Raappana, A., Carbonetti, S., *et al.* (2021).  
977 Antibody interference by a non-neutralizing antibody abrogates humoral protection against  
978 Plasmodium yoelii liver stage. *Cell Rep* 36, 109489.

979 WHO (2019). World malaria report 2019. . World Health Organization, Geneva.

980 WHO (2020). World malaria report 2020: 20 years of global progress and challenges. In  
981 World Health Organization, Geneva.

982 Ye, J., Ma, N., Madden, T.L., and Ostell, J.M. (2013). IgBLAST: an immunoglobulin variable  
983 domain sequence analysis tool. *Nucleic Acids Res* 41, W34-40.

984

# Figure 1

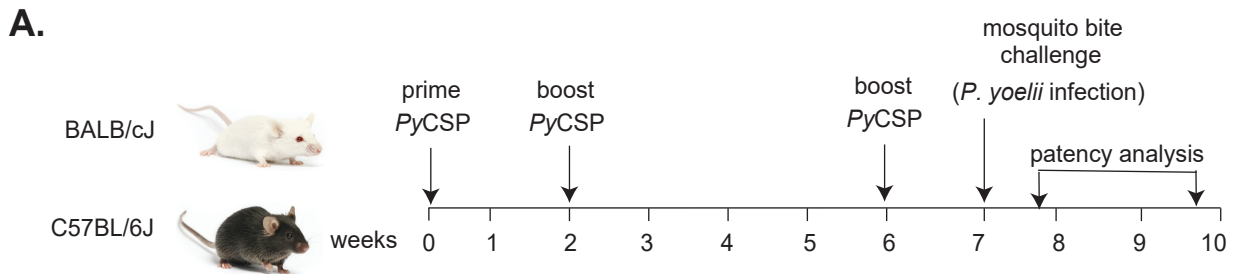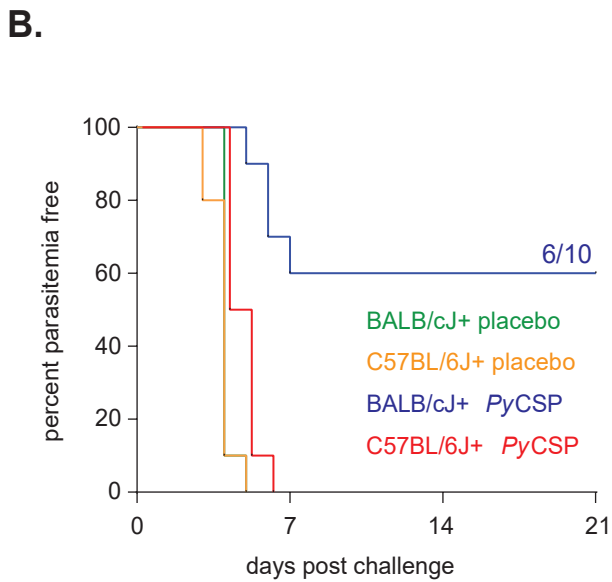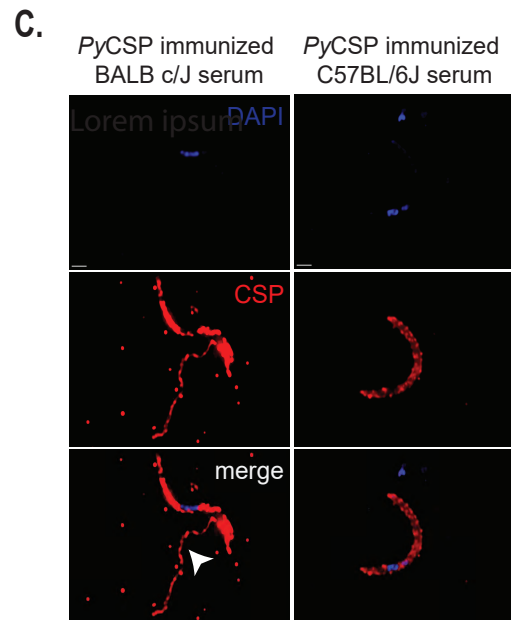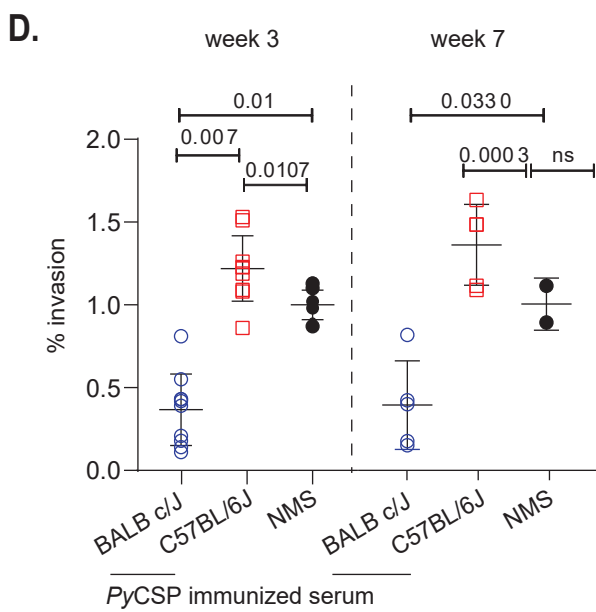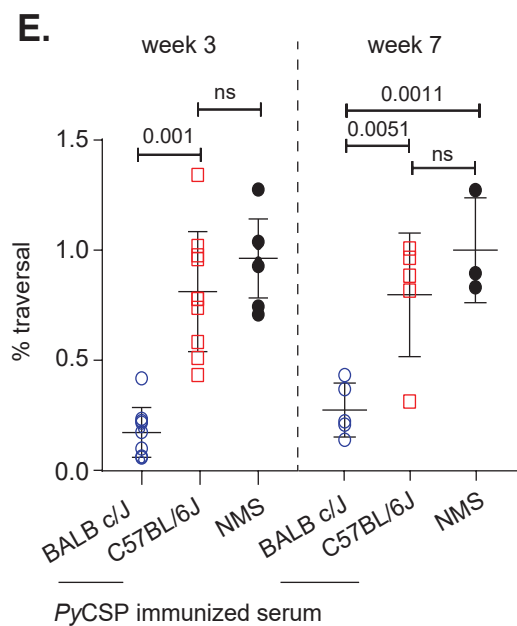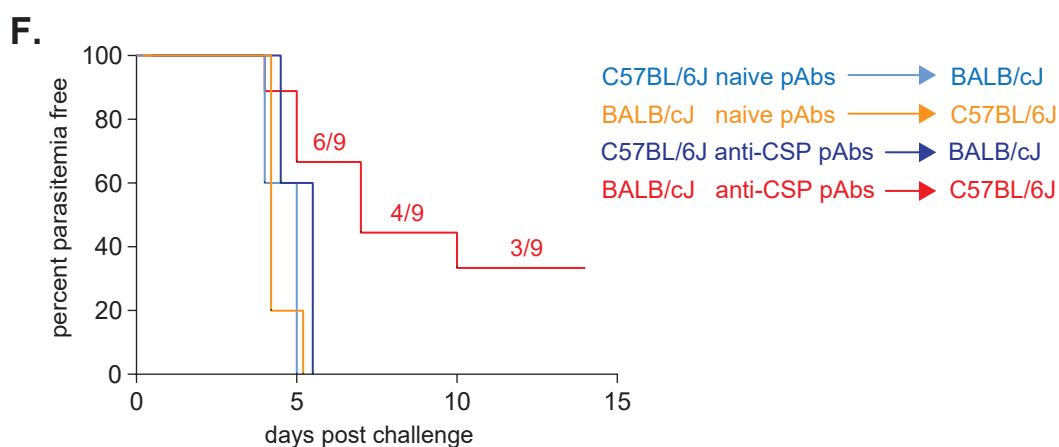

Figure 2.

A.

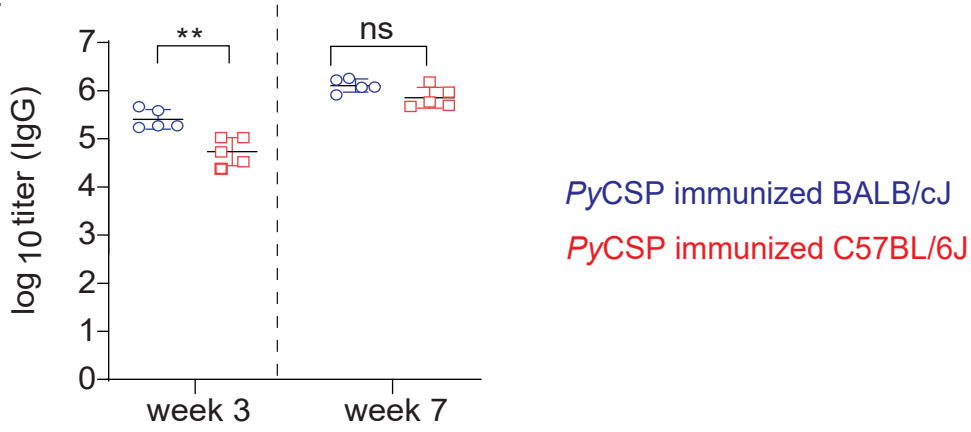

B.

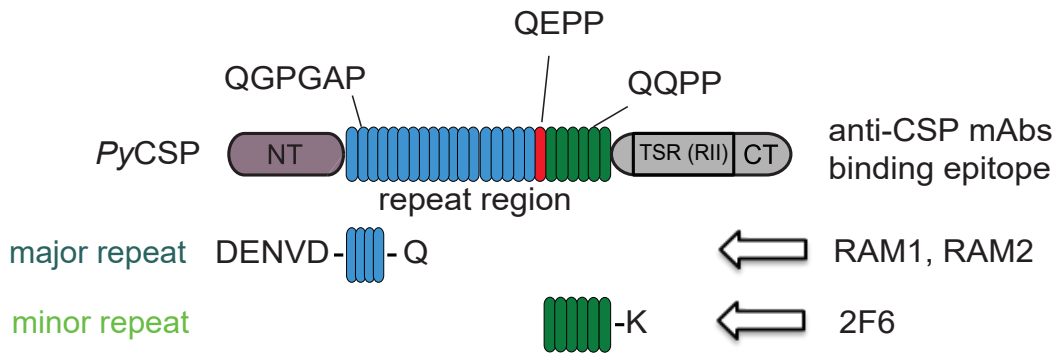

C.

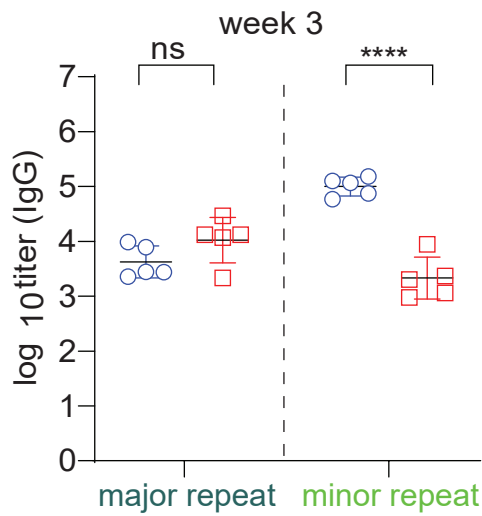

D.

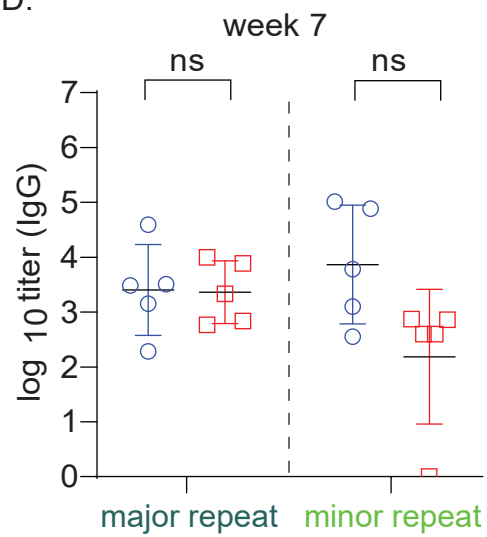

E.

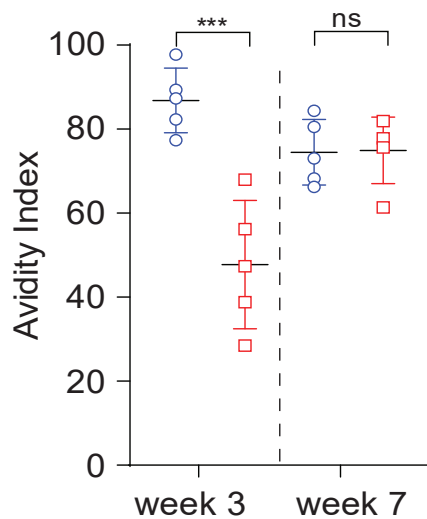



Figure 3

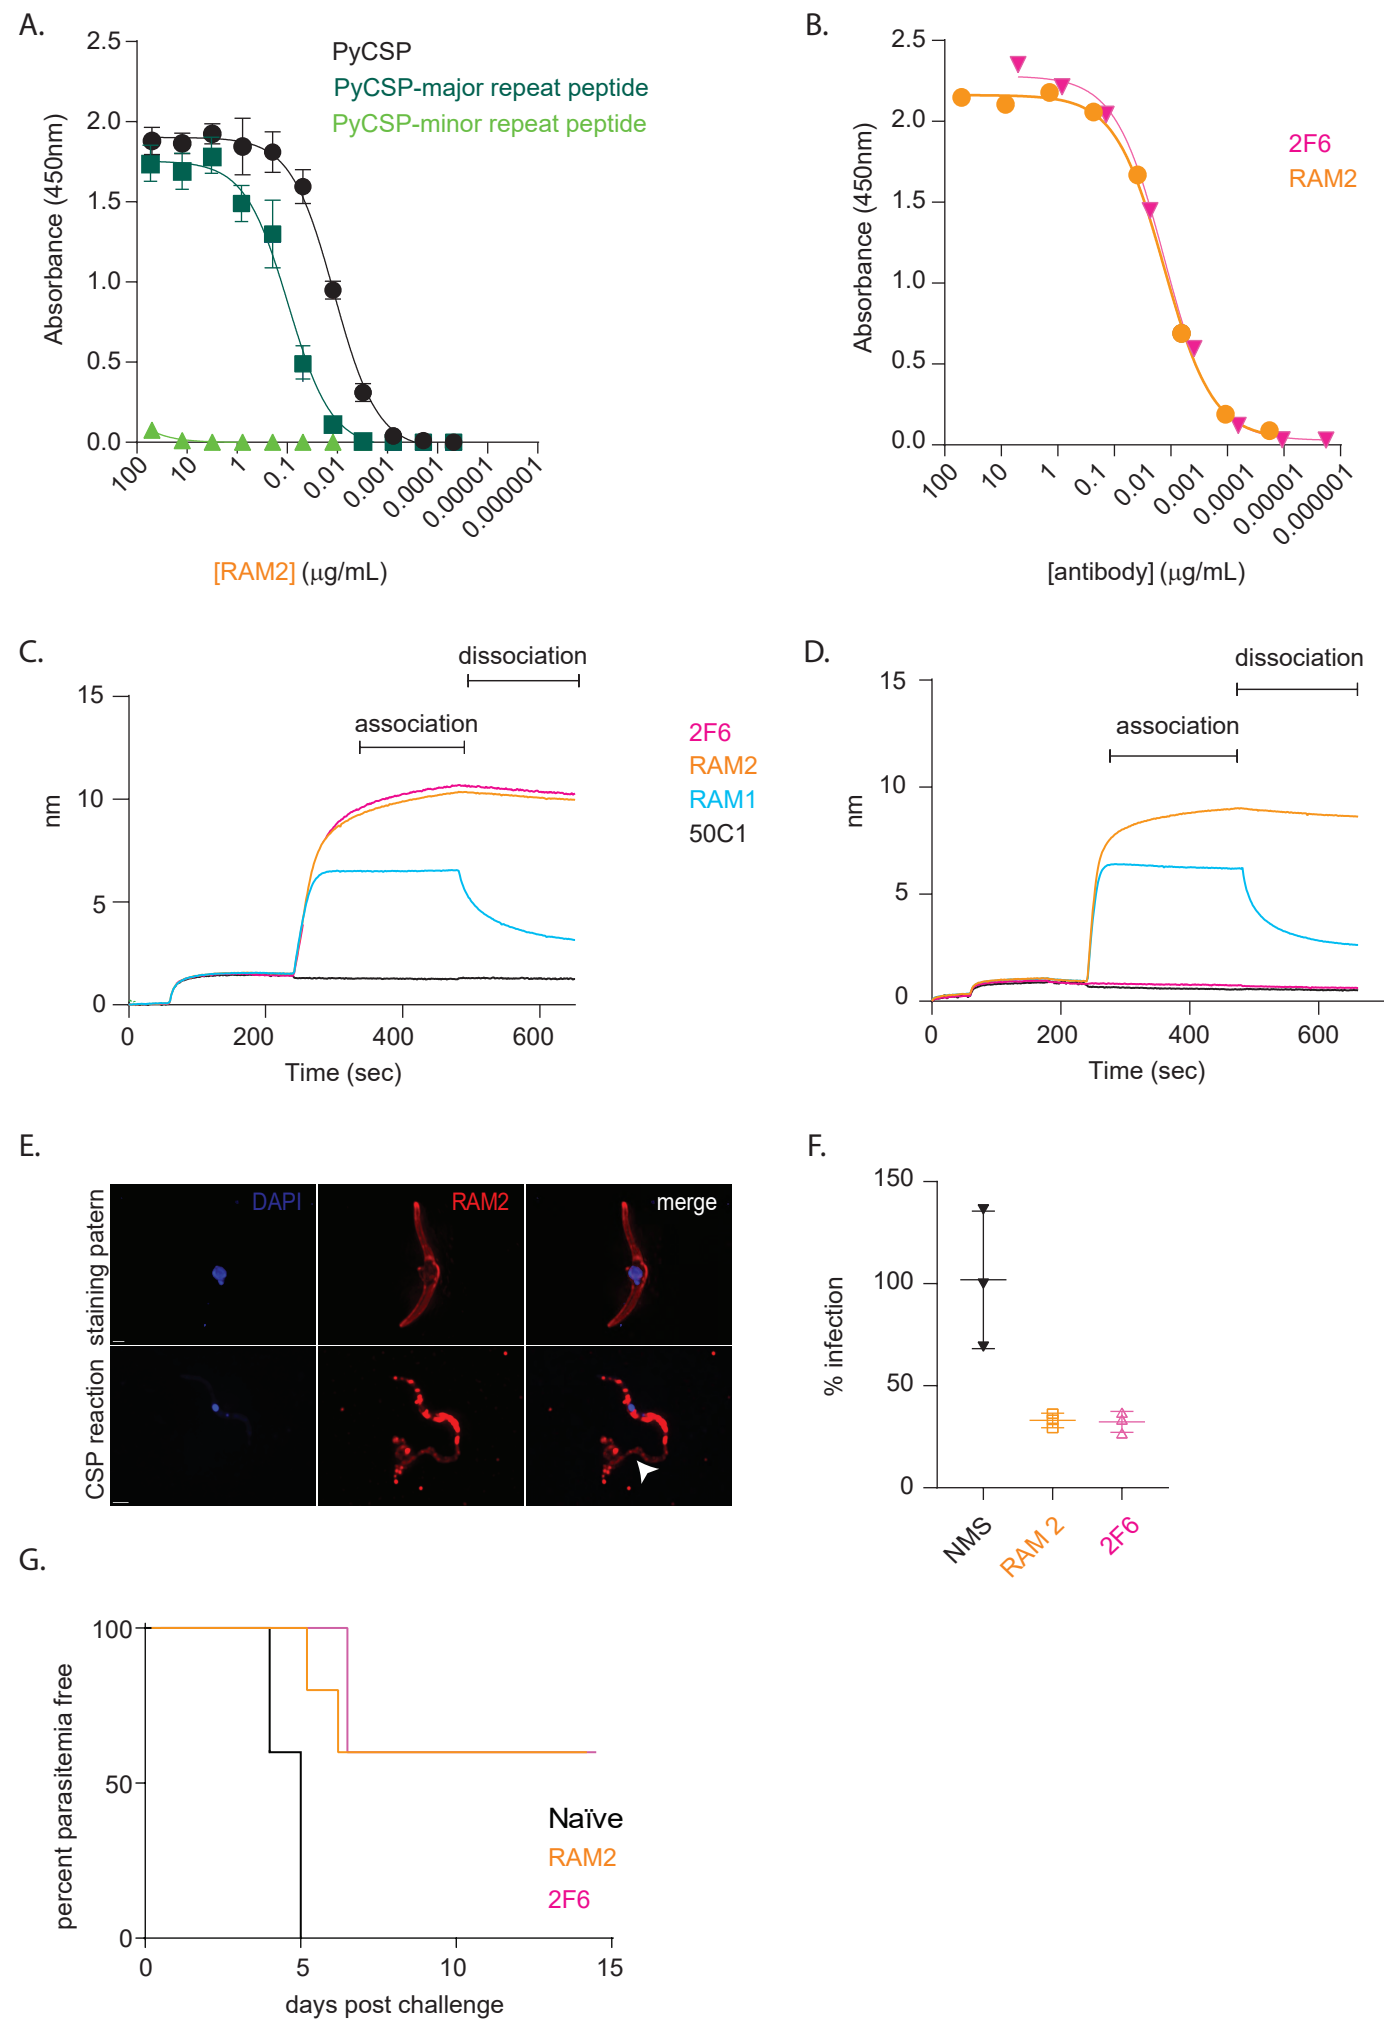

Figure 4.

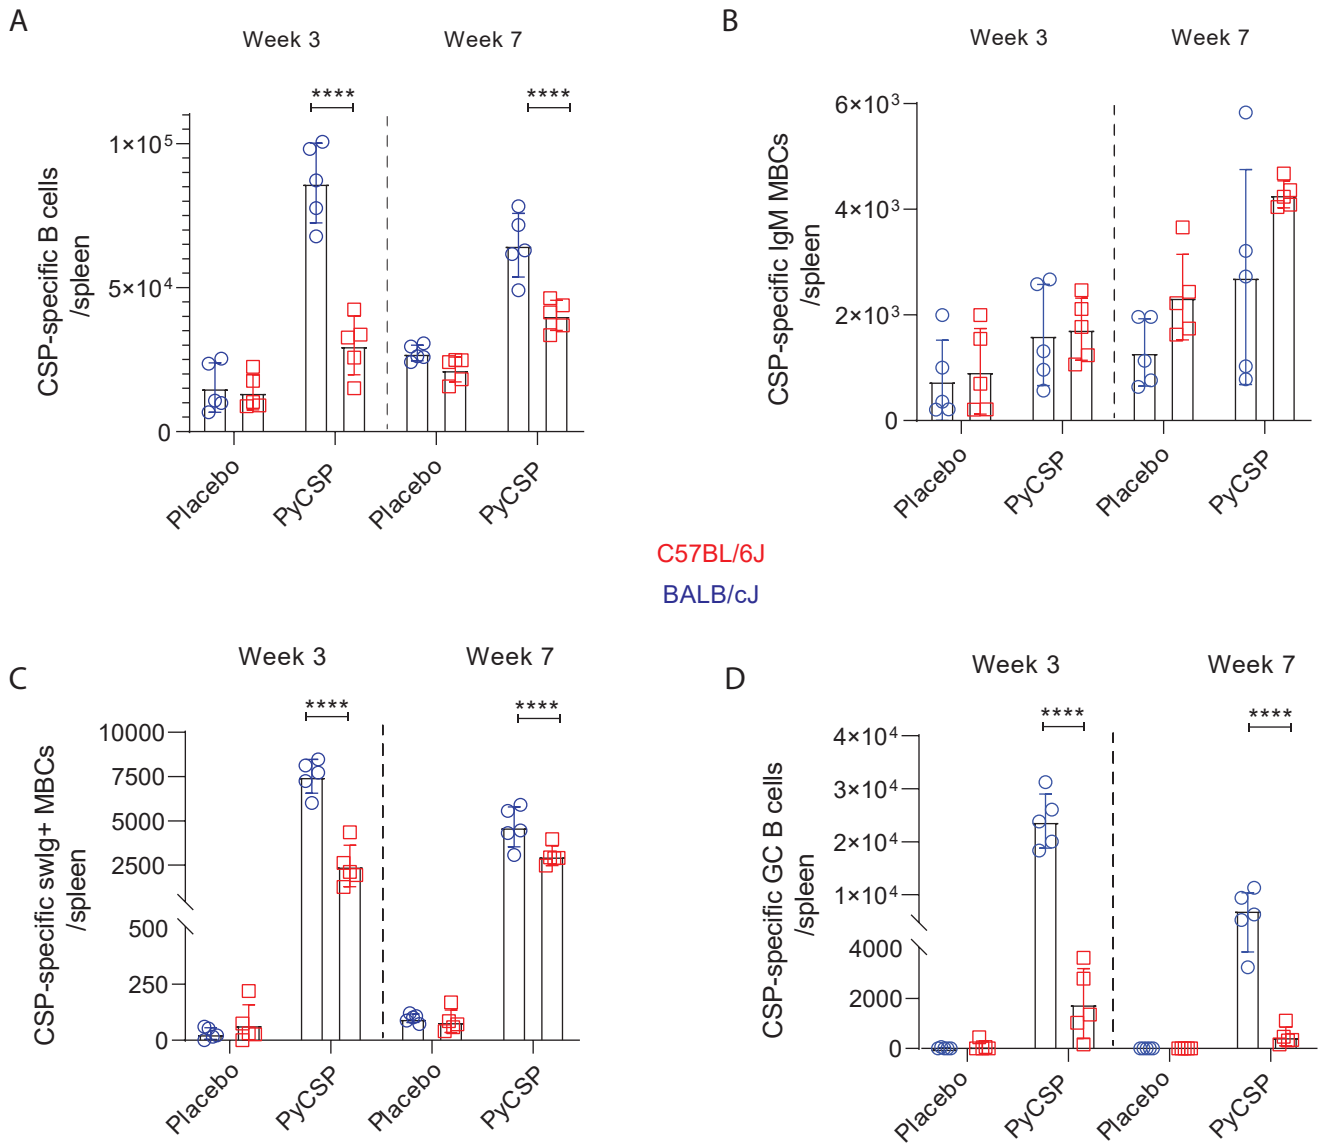

Figure 5

A.

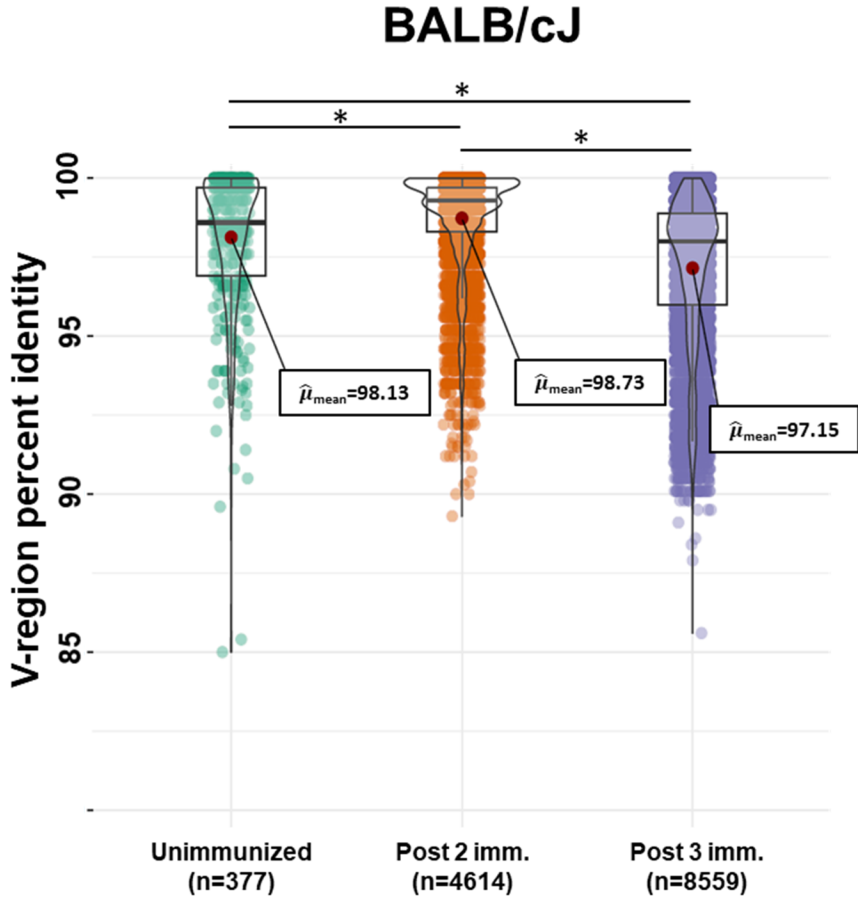

B.

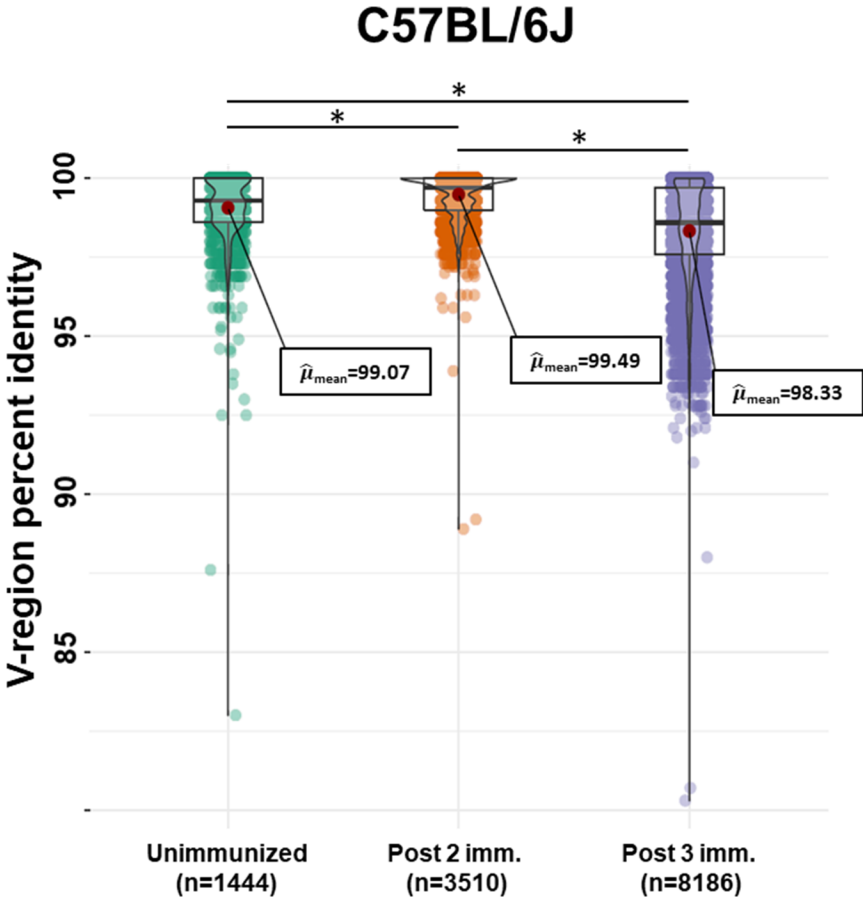

A related to Fig 1B.

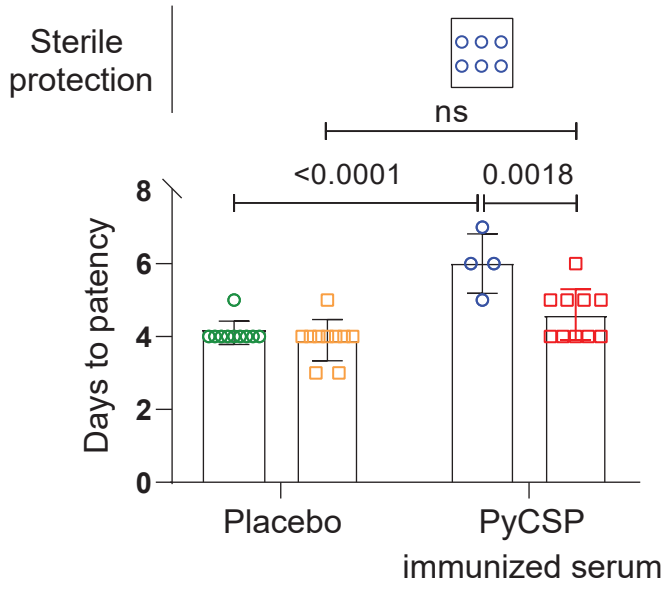

B related to Fig 1F.

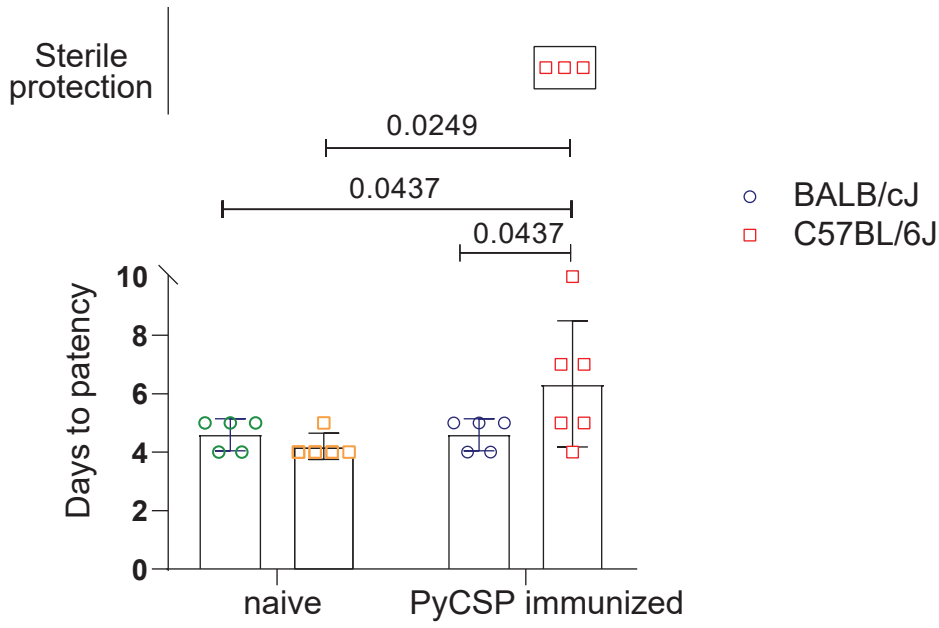

Figure S2.

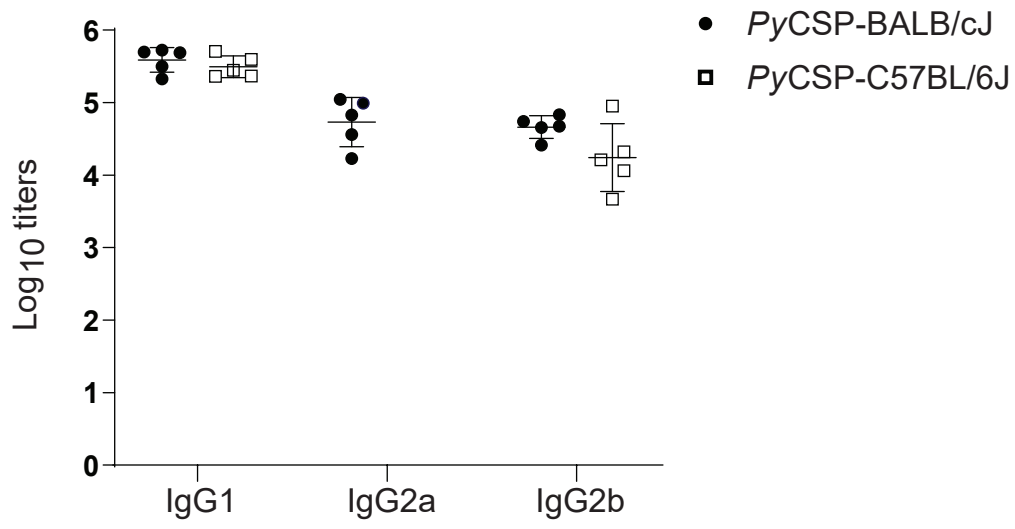

Figure S3.

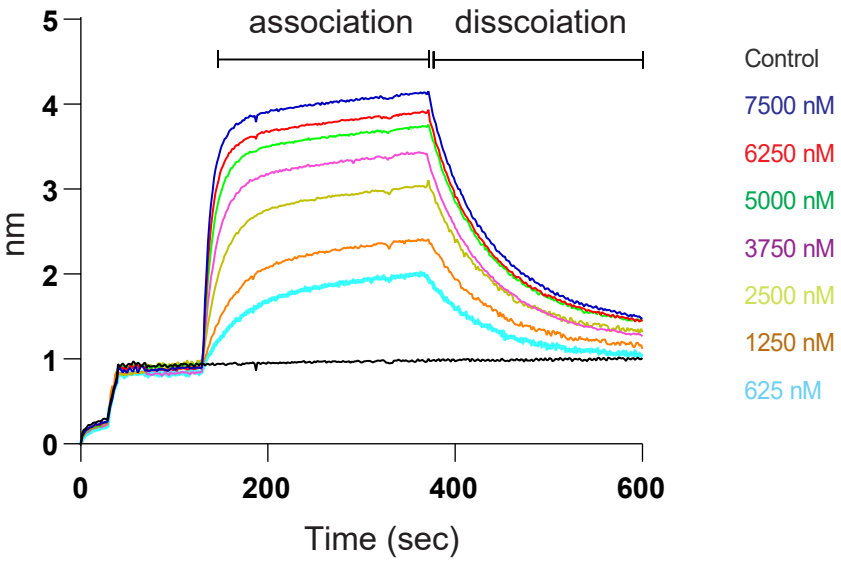

Figure S4.

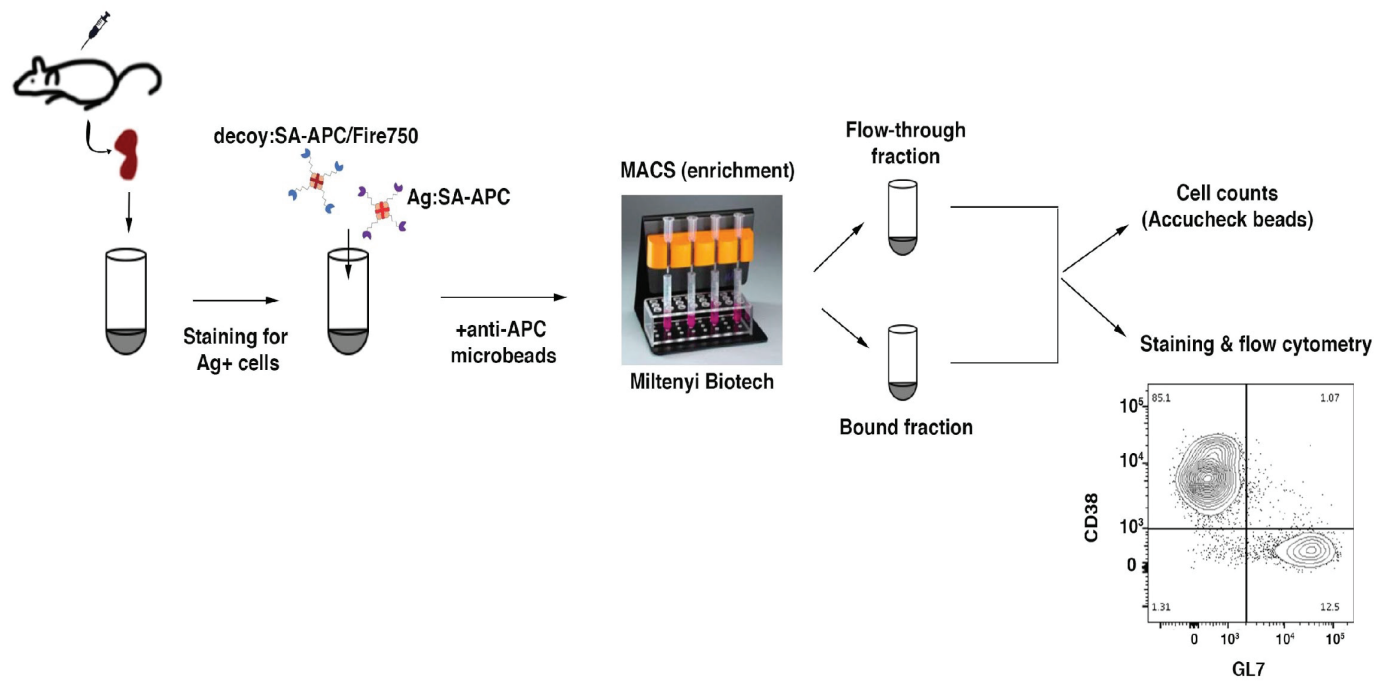

Figure S5

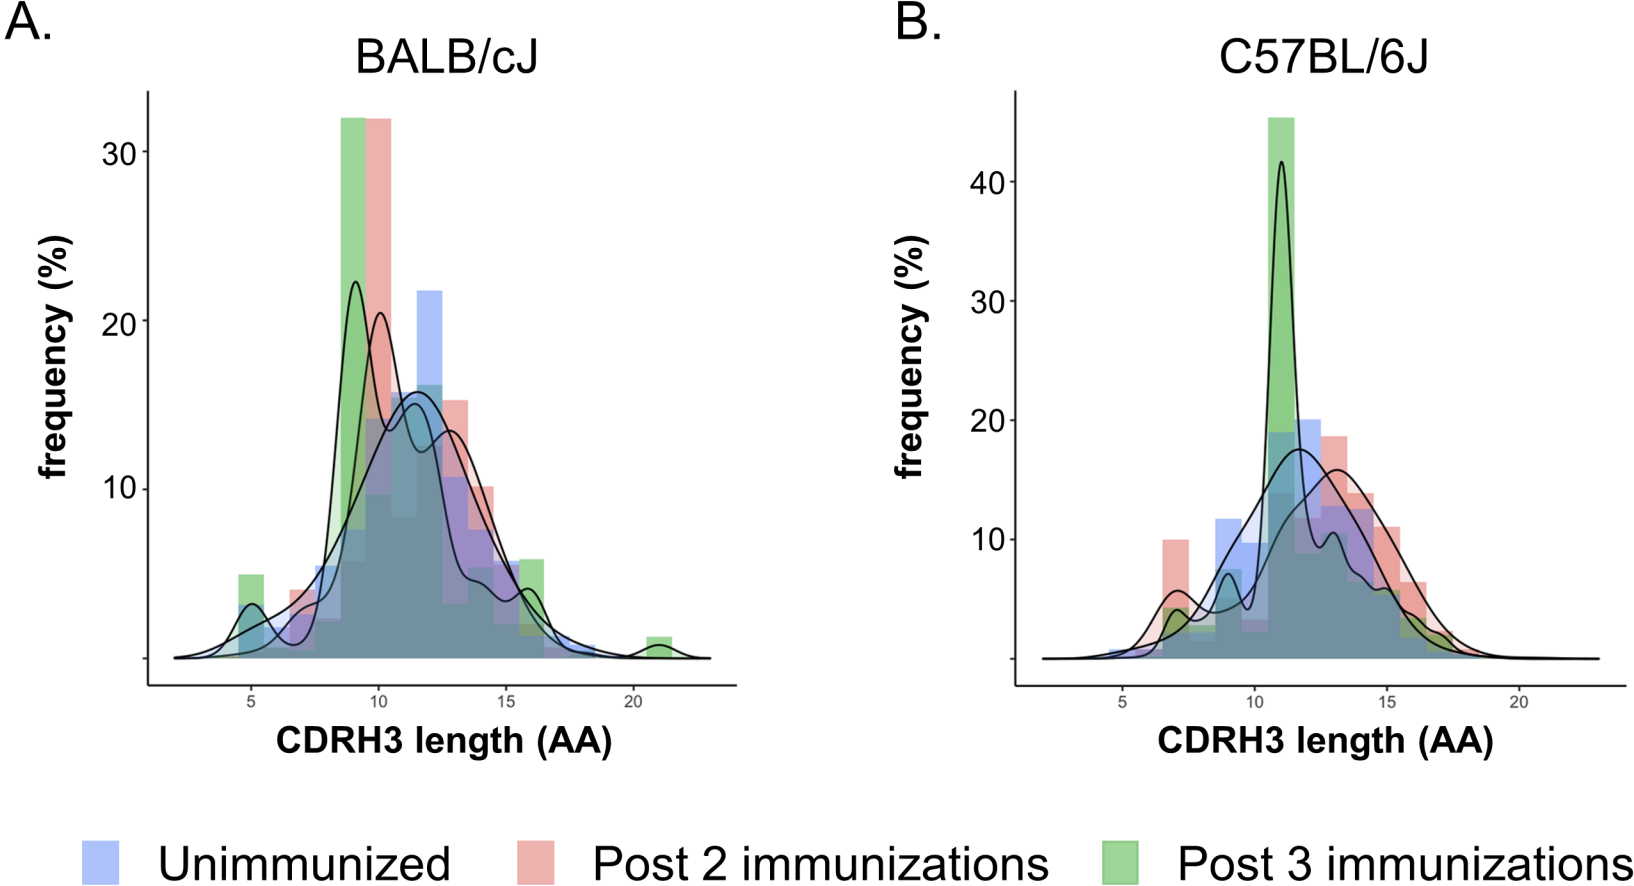

Source: https://www.biorxiv.org/content/biorxiv/early/2021/09/11/2021.09.10.459481.full.pdf
